## Wikidata as a FAIR knowledge graph for the life sciences

Andra Waagmeester<sup>1,\*</sup>, Gregory Stupp<sup>2,\*</sup>, Sebastian Burgstaller-Muehlbacher<sup>2,¶</sup>, Benjamin M. Good<sup>2</sup>, Malachi Griffith<sup>3</sup>, Obi Griffith<sup>3</sup>, Kristina Hanspers<sup>4</sup>, Henning Hermjakob<sup>5</sup>, Kevin Hybiske<sup>6</sup>, Sarah M. Keating<sup>5</sup>, Magnus Manske<sup>7</sup>, Michael Mayers<sup>2</sup>, Elvira Mitraka<sup>8</sup>, Alexander R. Pico<sup>4</sup>, Timothy Putman<sup>2</sup>, Anders Riutta<sup>4</sup>, Núria Queralt-Rosinach<sup>2</sup>, Lynn M. Schriml<sup>8</sup>, Denise Slenter<sup>9</sup>, Ginger Tsueng<sup>2</sup>, Roger Tu<sup>2</sup>, Egon Willighagen<sup>9</sup>, Chunlei Wu<sup>2</sup>, Andrew I. Su<sup>2,§</sup>

1 Micelio, Antwerp 2180, Belgium

2 The Scripps Research Institute, La Jolla, CA, USA

3 McDonnell Genome Institute, Washington University School of Medicine, St. Louis, MO, USA

4 Institute of Data Science and Biotechnology, Gladstone Institutes, San Francisco, CA, USA

5 European Molecular Biology Laboratory, European Bioinformatics Institute (EMBL-EBI), Wellcome Trust Genome Campus, CB10 1SD, Hinxton, United Kingdom

6 Division of Allergy and Infectious Diseases, Department of Medicine, University of Washington, Seattle, WA, USA

7 Wellcome Trust Sanger Institute, Hinxton, Cambridge CB10 1SA, UK

8 University of Maryland School of Medicine, Baltimore, Maryland, USA.

9 Department of Bioinformatics-BiGCaT, NUTRIM, Maastricht University, 6229 ER Maastricht, The Netherlands

(\*) equal contributions

(§) Correspondence: [asu@scripps.edu](mailto:asu@scripps.edu)

(¶) Present address: Center for Integrative Bioinformatics Vienna, Max F. Perutz Laboratories, University of Vienna, Medical University Vienna, Austria

### ORCID identifiers:

Andra Waagmeester, 0000-0001-9773-4008

Gregory Stupp, 0000-0002-0644-7212

Sebastian Burgstaller-Muehlbacher, 0000-0003-4640-3510

Benjamin M. Good, 0000-0002-7334-7852

Malachi Griffith, 0000-0002-6388-446X

Obi Griffith, 0000-0002-0843-4271

Kristina Hanspers 0000-0001-5410-599X

Henning Hermjakob, 0000-0001-8479-0262

Kevin Hybiske, 0000-0002-2967-3079

Sarah M. Keating, 0000-0002-3356-3542

Magnus Manske, 0000-0001-5916-0947

Michael Mayers, 0000-0002-7792-0150

Elvira Mitraka, 0000-0003-0719-3485

Alexander R. Pico 0000-0001-5706-2163

Timothy Putman, 0000-0002-4291-0737

Anders Riutta 0000-0002-4693-0591

Núria Queralt-Rosinach, 0000-0003-0169-8159

Lynn M. Schriml, 0000-0001-8910-9851

Denise Slenter, 0000-0001-8449-1318

Ginger Tsueng, 0000-0001-9536-9115

Roger Tu, 0000-0002-7899-1604

Egon Willighagen, 0000-0001-7542-0286

Chunlei Wu, 0000-0002-2629-6124

Andrew I. Su, 0000-0002-9859-4104

# 1 Abstract

2  
3 Wikidata is a community-maintained knowledge base that epitomizes the FAIR principles of Findability,  
4 Accessibility, Interoperability, and Reusability. Here, we describe the breadth and depth of biomedical  
5 knowledge contained within Wikidata, assembled from primary knowledge repositories on genomics,  
6 proteomics, genetic variants, pathways, chemical compounds, and diseases. We built a collection of  
7 open-source tools that simplify the addition and synchronization of Wikidata with source databases. We  
8 furthermore demonstrate several use cases of how the continuously updated, crowd-contributed  
9 knowledge in Wikidata can be mined. These use cases cover a diverse cross section of biomedical  
10 analyses, from crowdsourced curation of biomedical ontologies, to phenotype-based diagnosis of  
11 disease, to drug repurposing.

# 12 Introduction

13 Integrating data and knowledge is a formidable challenge in biomedical research. Although new  
14 scientific findings are being discovered at a rapid pace, a large proportion of that knowledge is either  
15 locked in data silos (where integration is hindered by differing nomenclature, data models, and licensing  
16 terms) [1], or even worse, locked away in free-text. The lack of an integrated and structured version of  
17 biomedical knowledge hinders efficient querying or mining of that information, a limitation that prevents  
18 the full utilization of our accumulated scientific knowledge.

19  
20 Recently, there has been a growing emphasis within the scientific community to ensure all scientific  
21 data are FAIR – Findable, Accessible, Interoperable, and Reusable – and there is a growing consensus  
22 around a concrete set of principles to ensure FAIRness [1,2]. Widespread implementation of these  
23 principles would greatly advance open data efforts to build a rich and heterogeneous network of  
24 scientific knowledge. That knowledge network could, in turn, be the foundation for many computational  
25 tools, applications and analyses.

26  
27 Most data and knowledge integration initiatives fall on either end of a spectrum. At one end, centralized  
28 efforts seek to bring all knowledge sources into a single database instance (e.g., [3]). This approach  
29 has the advantage of data alignment according to a common data model and of enabling high  
30 performance queries. However, centralized resources are very difficult and expensive to maintain and  
31 expand [4,5], in large part because of limited bandwidth and resources of the technical team and the  
32 bottlenecks that introduces.

33  
34 At the other end of the spectrum, distributed approaches to data integration leave in place a broad  
35 landscape of individual resources, focusing on technical infrastructure to query and integrate across  
36 them for each query. These approaches lower the barriers to adding new data by enabling anyone to  
37 publish data by following community standards. However, performance is often an issue when each  
38 query must be sent to many individual databases, and the performance of the system as a whole is  
39 highly dependent on the stability and performance of each individual component. In addition, data

1 integration requires harmonizing the differences in the data models and data formats between  
2 resources, a process that can often require significant skill and effort.

3  
4 Here we explore the use of Wikidata (<https://www.wikidata.org>) [6] as a platform for knowledge  
5 integration in the life sciences. Wikidata is an openly-accessible knowledge base that is editable by  
6 anyone. Like its sister project Wikipedia, the scope of Wikidata is nearly boundless, with items on topics  
7 as diverse as books, actors, historical events, and galaxies. Unlike Wikipedia, Wikidata focuses on  
8 representing knowledge in a structured format instead of primarily free text. As of September 2019,  
9 Wikidata's knowledge graph included over 750 million statements on 61 million items [7]. Wikidata also  
10 became the first Wikimedia project that surpassed one billion edits, achieved by its community of 20  
11 thousand active users and 80 active computational 'bots'. Since its inception in 2012, Wikidata has a  
12 proven track record for leveraging the crowdsourced efforts of engaged users in building a massive  
13 knowledge graph [8]. Wikidata is run by the Wikimedia Foundation (<https://wikimediafoundation.org>), an  
14 organization that has a long track record of developing and maintaining web applications at scale.

15  
16 As a knowledge integration platform, Wikidata combines several of the key strengths of the centralized  
17 and distributed approaches. A large portion of the Wikidata knowledge graph is based on the  
18 automated imports of large structured databases via Wikidata bots, thereby breaking down the walls of  
19 existing data silos. Since Wikidata is also based on a community-editing model, it harnesses the  
20 distributed efforts of a worldwide community of contributors. Anyone is empowered to add new  
21 statements, ranging from individual facts to large-scale data imports. Finally, all knowledge in Wikidata  
22 is queryable through a SPARQL query interface [9], which enables distributed queries across other  
23 Linked Data resources.

24  
25 In previous work, we seeded Wikidata with content from public and authoritative resources on  
26 structured knowledge on genes and proteins [10] and chemical compounds [11]. Here, we describe  
27 progress on expanding and enriching the biomedical knowledge graph within Wikidata, both by our  
28 team and by others in the community [12]. We also describe several representative use cases on how  
29 Wikidata can enable new analyses and improve the efficiency of research. Finally, we discuss how  
30 researchers can contribute to this effort to build a continuously-updated and community-maintained  
31 knowledge graph that epitomizes the FAIR principles.

## 32 Results

### 33 The Wikidata Biomedical Knowledge Graph

34 The original effort behind this work focused on creating and annotating Wikidata items for human and  
35 mouse genes and proteins [10], and was subsequently expanded to include microbial reference  
36 genomes from NCBI RefSeq [13]. Since then, the Wikidata community (including our team) has  
37 significantly expanded the depth and breadth of biological information within Wikidata, resulting in a  
38 rich, heterogeneous knowledge graph (**Figure 1**). Some of the key new data types and resources are  
39 described below.

40



1 **Figure 1. A class-level diagram of the Wikidata knowledge graph for biomedical entities.** Each box represents one type  
2 of biomedical entity. The header displays the name of that entity type, as well as the count of Wikidata items of that type. The  
3 lower portion of each box displays a partial listing of attributes about each entity type, together with the count of the number of  
4 items with that attribute. Edges between boxes represent the number of Wikidata statements corresponding to each  
5 combination of subject type, predicate, and object type. For clarity, edges for reciprocal relationships (e.g., "has part" and "part  
6 of") are combined into a single edge. All counts of Wikidata items are current as of September 2019. Data are generated using  
7 the code in <https://github.com/SuLab/genewikiworld>.

8  
9  
10  
11 **Genes and proteins.** Wikidata contains items for over 1.1 million genes and 940 thousand proteins  
12 from 201 unique taxa. Annotation data on genes and proteins come from several key databases  
13 including NCBI Gene [14], Ensembl [15], UniProt [16], InterPro [17], and the Protein Data Bank (PDB)  
14 [18]. These annotations include information on protein families, gene functions, protein domains,  
15 genomic location, and orthologs, as well as links to related compounds, diseases, and variants.

16  
17 **Genetic variants.** Annotations on genetic variants are primarily drawn from CIViC  
18 (<http://www.civicdb.org>), an open and community-curated database of cancer variants [19]. Variants are  
19 annotated with their relevance to disease predisposition, diagnosis, prognosis, and drug efficacy.  
20 Wikidata currently contains 1502 items corresponding to human genetic variants, focused on those with  
21 a clear clinical or therapeutic relevance.

22  
23 **Chemical compounds including drugs.** Wikidata has items for over 150 thousand chemical  
24 compounds, including over 3500 items which are specifically designated as medications. Compound  
25 attributes are drawn from a diverse set of databases, including PubChem [20], RxNorm [21], IUPHAR  
26 Guide to Pharmacology [22–24], NDF-RT [25], and LIPID MAPS [26]. These items typically contain  
27 statements describing chemical structure and key physicochemical properties, and links to databases  
28 with experimental data (MassBank [27,28], PDB Ligand [29], etc.) and toxicological information (EPA  
29 CompTox Dashboard [30]). Additionally, these items contain links to compound classes, disease  
30 indications, pharmaceutical products, and protein targets.

31  
32 **Pathways.** Wikidata has items for almost three thousand human biological pathways, primarily from  
33 two established public pathway repositories: Reactome [31] and WikiPathways [32]. The full details of  
34 the different pathways remain with the respective primary sources. Our bots enter data for Wikidata  
35 properties such as pathway name, identifier, organism, and the list of component genes, proteins, and  
36 chemical compounds. Properties for contributing authors (via ORCID properties [33]), descriptions and  
37 ontology annotations are also being added for Wikidata pathway entries.

38  
39 **Diseases.** Wikidata has items for over 16 thousand diseases, the majority of which were created based  
40 on imports from the Human Disease Ontology [34], with additional disease terms added from the  
41 Monarch Disease Ontology [3]. Disease attributes include medical classifications, symptoms, relevant  
42 drugs, as well as subclass relationships to higher-level disease categories. In instances where the  
43 Human Disease Ontology specifies a related anatomic region and/or a causative organism (for  
44 infectious diseases), corresponding statements are also added.



1 **References.** Whenever practical, the provenance of each statement added to Wikidata was also added  
2 in a structured format. References are part of the core data model for a Wikidata statement. References  
3 can either cite the primary resource from which the statement was retrieved (including details like  
4 version number of the resource), or they can link to a Wikidata item corresponding to a publication as  
5 provided by a primary resource (as an extension of the WikiCite project [35]), or both.

## 6 Bot automation

7 To programmatically upload biomedical knowledge to Wikidata, we developed a series of computer  
8 programs, or bots. Bot development began by reaching a consensus on data modeling with the  
9 Wikidata community, particularly the Molecular Biology WikiProject [36]. We then coded each bot to  
10 perform data retrieval from a primary resource, data transformation and normalization, and then data  
11 upload via the Wikidata **application programming interface (API)**.

12  
13 We generalized the common code modules into a Python library, called **Wikidata Integrator (WDI)**, to  
14 simplify the process of creating Wikidata bots [37]. Relative to accessing the API directly, WDI has  
15 convenient features that improve the bot development experience. These features include the creation  
16 of items for scientific articles as references, basic detection of data model conflicts, automated  
17 detection of items needing update, detailed logging and error handling, and detection and preservation  
18 of conflicting human edits.

19  
20 Just as important as the initial data upload is the synchronization of updates between the primary  
21 sources and Wikidata. We utilized Jenkins, an open-source automation server, to automate all our  
22 Wikidata bots. This system allows for flexible scheduling, job tracking, dependency management, and  
23 automated logging and notification. Bots are either run on a predefined schedule (for continuously  
24 updated resources) or when new versions of original databases are released.

## 25 Applications

### 26 Identifier Translation

27 Translating between identifiers from different databases is one of the most common operations in  
28 bioinformatics analyses. Unfortunately, these translations are most often done by bespoke scripts and  
29 based on entity-specific mapping tables. These translation scripts are repetitively and redundantly  
30 written across our community and are rarely kept up to date.

31  
32 An identifier translation service is a simple and straightforward application of the biomedical content in  
33 Wikidata. Based on mapping tables that have been imported, Wikidata items can be mapped to  
34 databases that are both widely- and rarely-used in the life sciences community. Because all these  
35 mappings are stored in a centralized database and use a systematic data model, generic and reusable  
36 translation scripts can easily be written (**Figure 2**). These scripts can be used as a foundation for more  
37 complex Wikidata queries, or the results can be downloaded and used as part of larger scripts or  
38 analyses.

39

1 There are a number of other tools that are also aimed at solving the identifier translation use case,  
2 including the BioThings APIs [38], BridgeDb [39], BioMart [40], UMLS [41], and NCI Thesaurus [42].  
3 Relative to these tools, Wikidata distinguishes itself with a unique combination of the following:

- 4
- 5 • an almost limitless scope including all entities in biology, chemistry, and medicine;
- 6 • a data model that can represent exact, broader, and narrow matches between items in different  
7 identifier namespaces (beyond semantically imprecise "cross-references");
- 8 • programmatic access through web services with a track record of high-performance and high-  
9 availability

10  
11 Moreover, Wikidata is also unique as it is the only tool that allows real-time community editing. So while  
12 Wikidata is certainly not complete with respect to identifier mappings, it can be continually improved  
13 independent of any centralized effort or curation authority.

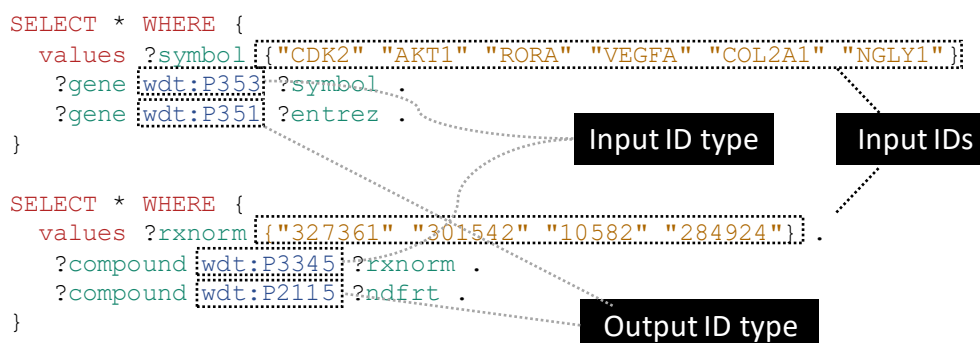

15  
16 **Figure 2. Generalizable SPARQL template for identifier translation.** This [simple example](#) shows how identifiers of any  
17 biological type can easily be translated using SPARQL queries. These queries operate on Wikidata properties for gene  
18 symbols (wdt:P353) and Entrez Gene IDs (wdt:P351) (top), and RxNorm concept IDs (wdt:P3345) and NDF-RT IDs  
19 (wdt:P2115) (bottom). These queries can be submitted to the Wikidata Query Service (WDQS; <https://query.wikidata.org/>) to  
20 get real-time results from Wikidata data. Relatively simple extensions of these queries can also be added to filter mappings  
21 based on the statement references and/or qualifiers. A full list of Wikidata properties can be found at [43]. Note that for  
22 translating a large number of identifiers, it is often more efficient to perform a SPARQL query to retrieve all mappings and then  
23 perform additional filtering locally.

## 25 Integrative Queries

26  
27 Wikidata contains a much broader set of information than just identifier cross-references. Having  
28 biomedical data in one centralized data resource facilitates powerful integrative queries that span  
29 multiple domain areas and data sources. Performing these integrative queries through Wikidata  
30 obviates the need to perform many time-consuming and error-prone data integration steps.

31  
32 As an example, consider a pulmonologist who is interested in identifying candidate chemical  
33 compounds for testing in disease models (schematically illustrated in **Figure 3**). She may start by  
34 identifying genes with a genetic association to any respiratory disease, with a particular interest in  
35 genes that encode membrane-bound proteins (for ease in cell sorting). She may then look for chemical

1 compounds that either directly inhibit those proteins, or finding none, compounds that inhibit another  
2 protein in the same pathway. Because she has collaborators with relevant expertise, she may  
3 specifically filter for proteins containing a serine-threonine kinase domain.

4  
5 Almost any competent informatician can perform the query described above by integrating cell  
6 localization data from Gene Ontology annotations, genetic associations from GWAS Catalog, disease  
7 subclass relationships from the Human Disease Ontology, pathway data from WikiPathways and  
8 Reactome, compound targets from the IUPHAR Guide to Pharmacology, and protein domain  
9 information from InterPro. However, actually performing this data integration is a time-consuming and  
10 error-prone process. At the time of publication of this manuscript, this Wikidata query completed in less  
11 than 10 seconds and reported 31 unique compounds. Importantly, the results of that query will always  
12 be up-to-date with the latest information in Wikidata.

13  
14 This query, and other example SPARQL queries that take advantage of the rich, heterogeneous  
15 knowledge network in Wikidata are available at  
16 [https://www.wikidata.org/wiki/User:ProteinBoxBot/SPARQL\\_Examples](https://www.wikidata.org/wiki/User:ProteinBoxBot/SPARQL_Examples). That page additionally  
17 demonstrates federated SPARQL queries that perform complex queries across other biomedical  
18 SPARQL endpoints. Federated queries are useful for accessing data that cannot be included in  
19 Wikidata directly due to limitations in size, scope, or licensing.

20

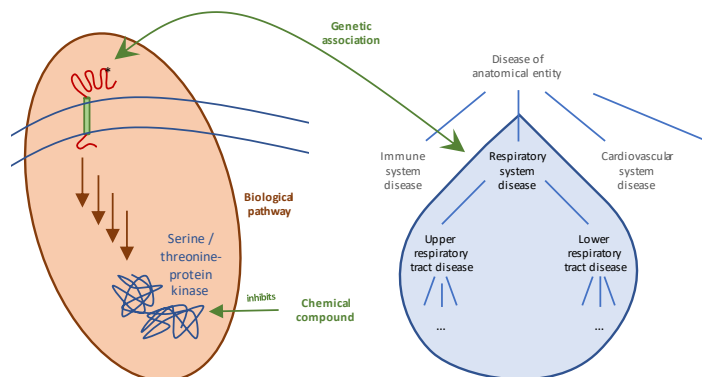

```
SELECT DISTINCT ?compound ?compoundLabel where {  
# gene has genetic association with a respiratory disease  
?gene wdt:P31 wd:Q7187 .  
?gene wdt:P2293 ?diseaseGA .  
?diseaseGA wdt:P279* wd:Q3286546 .  
# gene product is localized to the membrane  
?gene wdt:P688 ?protein .  
?protein wdt:P681 ?cc .  
?cc wdt:P279*|wdt:P361* wd:Q14349455 .  
# gene is involved in a pathway with another gene ("gene2")  
?pathway wdt:P31 wd:Q4915012 ;  
wdt:P527 ?gene ;  
wdt:P527 ?gene2 .  
?gene2 wdt:P31 wd:Q7187 .  
# gene2 product has a Ser/Thr protein kinase domain AND known enzyme inhibitor  
?gene2 wdt:P688 ?protein2 .  
?protein2 wdt:P129 ?compound ;  
wdt:P527 wd:Q24787419 ;  
p:P129 ?s2 .  
?s2 ps:P129 ?cp2 .  
?cp2 wdt:P31 wd:Q11173 .  
FILTER EXISTS {?s2 pq:P366 wd:Q427492 .}  
SERVICE wikibase:label { bd:serviceParam wikibase:language "en" . }
```

21

22

23 **Figure 3. A representative SPARQL query that integrates data from multiple data resources and annotation types.**

24 This query incorporates data on genetic associations to disease, Gene Ontology annotations for cellular compartment, protein  
25 target information for compounds, pathway data, and protein domain information. More context is provided in the text. Real-  
26 time query results can be viewed at <https://w.wiki/6pZ>.

## 27 Crowdsourced Curation

28 Ontologies are essential resources for structuring biomedical knowledge. However, even after the initial  
29 effort in creating an ontology is finalized, significant resources must be devoted to maintenance and  
30 further development. These tasks include cataloging cross references to other ontologies and  
31 vocabularies, and modifying the ontology as current knowledge evolves. Community curation has been  
32 explored in a variety of tasks in ontology curation and annotation (e.g., [13,44–47]). While community



1 curation offers the potential of distributing these responsibilities over a wider set of scientists, it also has  
2 the potential to introduce errors and inconsistencies.

3  
4 Here, we examined how a crowd-based curation model through Wikidata works in practice. We  
5 designed a system to monitor, filter, and prioritize changes made by Wikidata contributors to items in  
6 the Human Disease Ontology. We initially seeded Wikidata with disease items from the Disease  
7 Ontology (DO) starting in late 2015. Beginning in 2018, we compared the disease data in Wikidata to  
8 the most current DO release on a monthly basis.

9  
10 In our first comparison between Wikidata and the official DO release, we found that Wikidata users  
11 added a total of 2030 new cross references to GARD [48] and MeSH [49]. Each cross reference was  
12 manually reviewed by DO curators, and 98.9% of these mappings were deemed correct and therefore  
13 added to the ensuing DO release. Each subsequent monthly report included a smaller number of added  
14 cross references to GARD and MeSH, as well as ORDO [50], and OMIM [51,52], and these entries  
15 were incorporated after expert review at a high approval rate (>90%). Wikidata users also suggested  
16 numerous refinements to the ontology structure, including changes to the subclass relationships and  
17 the addition of new disease terms. While these structural changes were rarely incorporated into DO  
18 releases with no modifications, they often prompted further review and refinement by DO curators in  
19 specific subsections of the ontology.

20  
21 The Wikidata crowdsourcing curation model is generalizable to any other external resource that is  
22 automatically synced to Wikidata. The code to detect changes and assemble reports is tracked online  
23 [53] and can easily be adapted to other domain areas. This approach offers a novel solution for  
24 integrating new knowledge into a biomedical ontology through distributed crowdsourcing while  
25 preserving control over the expert curation process. Incorporation into Wikidata also enhances  
26 exposure and visibility of the resource by engaging a broader community of users and curators.

## 27 Interactive Pathway Pages

28 In addition to its use as a repository for data, we explored the use of Wikidata as a primary access and  
29 visualization endpoint for pathway data. We used Scholia, a web app for displaying scholarly profiles for  
30 a variety of Wikidata entries, including individual researchers, research topics, chemicals, and proteins  
31 [11]. Scholia provides a more user-friendly view of Wikidata content with context and interactivity that is  
32 tailored to the entity type.

33  
34 We contributed a Scholia profile template specifically for biological pathways [54,55]. In addition to  
35 essential items such as title and description, these pathway pages include an interactive view of the  
36 pathway diagram collectively drawn by contributing authors. The WikiPathways identifier property in  
37 Wikidata informs the Scholia template to source a *pathway-viewer* widget from Toolforge [56] that in  
38 turn retrieves the corresponding interactive pathway image. Embedded into the Scholia pathway page,  
39 the widget provides pan and zoom, plus links to gene, protein and chemical Scholia pages for every  
40 clickable molecule on the pathway diagram (see for example [57]). Each pathway page also includes  
41 information about the pathway authors. The Scholia template also generates a participants table that  
42 shows the genes, proteins, metabolites, and chemical compounds that play a role in the pathway, as  
43 well as citation information in both tabular and chart formats.

1  
2  
3  
4  
5  
6  
  
7  
  
8  
9  
10  
11  
12  
13  
14  
15  
16  
17  
18  
19  
20  
21  
22  
23  
24  
25  
26  
27  
28  
29  
  
30  
31  
32  
33  
34

With Scholia template views of Wikidata, we are able to generate interactive pathway pages with comparable content and functionality to that of dedicated pathway databases. Wikidata provides a powerful interface to access these biological pathway data in the context of other biomedical knowledge, and Scholia templates provide rich, dynamic views of Wikidata that are relatively simple to develop and maintain.

## Phenotype-based disease diagnosis

Phenomizer is a web application that suggests clinical diagnoses based on an array of patient phenotypes. Phenomizer takes as input a list of phenotypes (using the Human Phenotype Ontology (HPO) [58]) and an association file between phenotypes and diseases, and the Phenomizer algorithm suggests disease diagnoses based on semantic similarity [59]. Here, we studied whether phenotype-disease associations from Wikidata could improve Phenomizer's ability to make differential diagnoses for certain sets of phenotypes. We modified the Phenomizer codebase to accept arbitrary inputs and to be able to run from the command line [60] and also wrote a script to extract and incorporate the phenotype-disease annotations in Wikidata [61].

As of September 2019, there were 273 phenotype-disease associations in Wikidata that were not in the HPO's annotation file (which contained a total of 172,760 associations). Based on parallel biocuration work by our team, many of these new associations were related to the disease Congenital Disorder of Deglycosylation (CDDG; also known as NGLY-1 deficiency). To see if the Wikidata-sourced annotations improved the ability of Phenomizer to diagnose CDDG, we ran our modified version using the phenotypes taken from a publication describing two siblings with suspected cases of CDDG [62]. Using these phenotypes and the annotation file supplemented with Wikidata-derived associations, Phenomizer returned a much stronger semantic similarity to CDDG relative to the HPO annotation file alone (**Figure 4**). Analyses with the combined annotation file reported CDDG as the top result for each of the past 14 releases of the HPO annotation file, whereas CDDG was never the top result when run without the Wikidata-derived annotations. This result demonstrated an example scenario in which Wikidata-derived annotations could be a useful complement to expert curation.

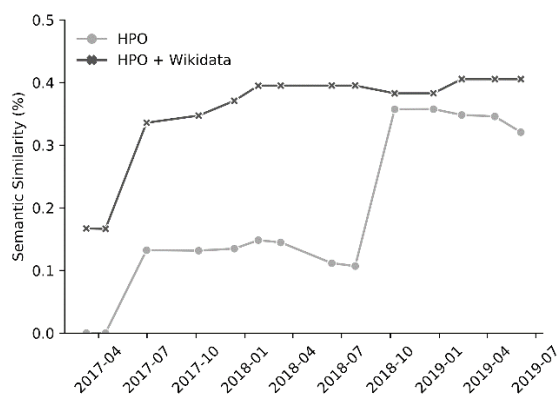

**Figure 4. Phenomizer analysis of suspected cases of CDDG.** Clinical phenotypes from two cases of suspected CDDG patients were extracted from a published case report [62]. These phenotypes were run through the Phenomizer tool using phenotype-disease annotations from HPO alone, or from a combination of HPO and Wikidata. The semantic similarity score for CDDG is reported on the y-axis.

## 1 Drug Repurposing

2 The mining of graphs for latent edges has been an area of interest in a variety of contexts from  
3 predicting friend relationships in social media platforms to suggesting movies based on past viewing  
4 history. A number of groups have explored the mining of knowledge graphs to reveal biomedical  
5 insights, with the open source Rephetio effort for drug repurposing as one example [63]. Rephetio uses  
6 logistic regression, with features based on graph metapaths, to predict drug repurposing candidates.  
7

8 The knowledge graph that served as the foundation for Rephetio was manually assembled from many  
9 different resources into a heterogeneous knowledge network. Here, we explored whether the Rephetio  
10 algorithm could successfully predict drug indications on the Wikidata knowledge graph. Based on the  
11 class diagram in **Figure 1**, we extracted a biomedically-focused subgraph of Wikidata with 19 node  
12 types and 41 edge types. We performed five-fold cross validation on drug indications within Wikidata  
13 and found that Rephetio substantially enriched for the true indications in the hold-out set. We then  
14 downloaded historical Wikidata versions from 2017 and 2018, and observed marked improvements in  
15 performance over time (**Figure 6**). We also performed this analysis using an external test set based on  
16 Drug Central, which showed a similar improvement in Rephetio results over time (**Supplemental**  
17 **Figure 1**).

18  
19 This analysis demonstrates the value of a community-maintained, centralized knowledge base to which  
20 many researchers are contributing. It suggests that scientific analyses based on Wikidata may  
21 continually improve irrespective of any changes to the underlying algorithms, but simply based on  
22 progress in curating knowledge through the distributed, and largely uncoordinated efforts of the  
23 Wikidata community.  
24

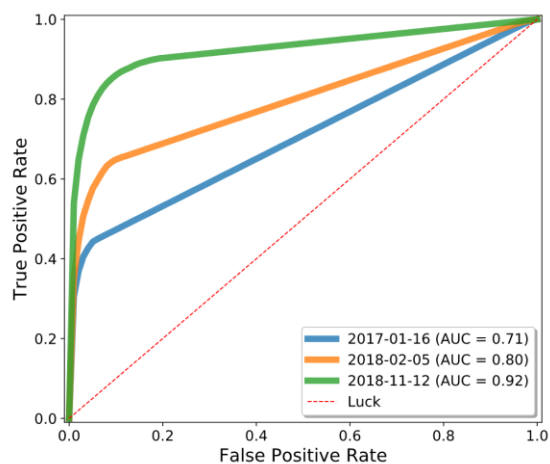

25

26

27 **Figure 5. Drug repurposing using the Wikidata knowledge graph.** We analyzed three snapshots of Wikidata using  
28 Rephetio, a graph-based algorithm for predicting drug repurposing candidates [63]. We evaluated the performance of the  
29 Rephetio algorithm on three historical versions of the Wikidata knowledge graph, quantified based on the area under the  
30 receiver operator characteristic curve (AUC). This analysis demonstrated that the performance of Rephetio in drug  
31 repurposing improved over time based only on improvements to the underlying knowledge graph. Details of this analysis can  
32 be found at <https://github.com/SuLab/WD-rephetio-analysis>.  
33

33

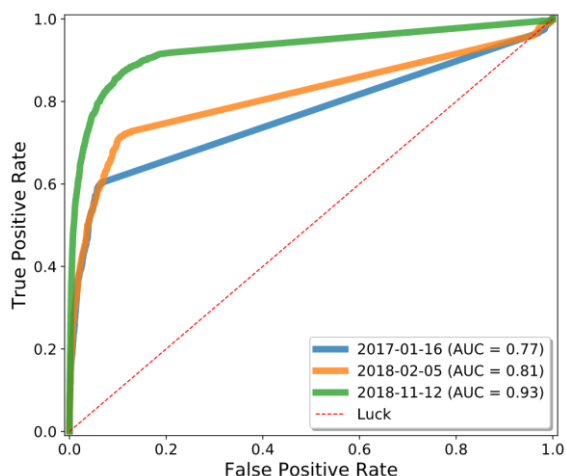

1  
2 **Supplemental Figure 1. Drug repurposing using the Wikidata knowledge graph, evaluated using an external test set.**  
3 Whereas the analysis in Figure 5 was based on a cross-validation of indications that were present in Wikidata, we also ran our  
4 time-resolved analysis using an external gold standard set of indications from Drug Central [64].

## 5 Discussion

6 We believe that Wikidata is among the most FAIR biomedical resources available (a view that is also  
7 shared among some funding bodies [65]).

- 8
- 9 ● **Findable:** Wikidata items are assigned globally unique identifiers with direct cross-links into the  
10 massive online ecosystem of Wikipedias. Wikidata also has broad visibility within the Linked  
11 Data community and listed in the life science registries FAIRsharing [66] and Identifiers.org [67].  
12 Wikidata has already attracted a robust, global community of contributors and consumers.
  - 13 ● **Accessible:** Wikidata provides access to its underlying knowledge graph via both an online  
14 graphical user interface and an API, and access includes both read- and write-privileges.  
15 Wikidata also provides database dumps at least weekly [68], ensuring the long-term  
16 accessibility of the Wikidata knowledge graph independent of the organization and web  
17 application.
  - 18 ● **Interoperable:** Wikidata items are extensively cross-linked to other biomedical resources using  
19 Universal Resource Identifiers (URIs), which unambiguously anchor these concepts in the  
20 Linked Open Data cloud [69]. Wikidata is also available in many standard formats in computer  
21 programming and knowledge management, including JSON, XML, and RDF.
  - 22 ● **Reusable:** Data provenance is directly tracked in the reference section of the Wikidata  
23 statement model. The Wikidata knowledge graph is released under the Creative Commons Zero  
24 (CC0) Public Domain Declaration, which explicitly declares that there are no restrictions on  
25 downstream reuse and redistribution [70].
- 26

27 The open data licensing of Wikidata is particularly notable. The use of data licenses in biomedical  
28 research has rapidly proliferated, presumably in an effort to protect intellectual property and/or justify  
29 long-term grant funding (e.g. [71]). However, even seemingly innocuous license terms (like  
30 requirements for attribution) still impose legal requirements and therefore expose consumers to legal  
31 liability. This liability is especially problematic for data integration efforts, in which the license terms of

1 all resources (dozens or hundreds or more) must be independently tracked and satisfied (a  
2 phenomenon referred to as "license stacking"). Because it is released under CC0, Wikidata can be  
3 freely and openly used in any other resource without any restriction. This freedom greatly simplifies and  
4 encourages downstream use.

5  
6 In addition to simplifying data licensing, Wikidata offers significant advantages in centralizing the data  
7 harmonization process. Consider the use case of trying to get a comprehensive list of disease  
8 indications for the drug bupropion. The National Drug File - Reference Terminology (NDF-RT) reported  
9 that bupropion may treat nicotine dependence and attention deficit hyperactivity disorder, the Inxight  
10 database listed major depressive disorder, and the FDA Adverse Event Reporting System (FAERS)  
11 listed anxiety and bipolar disorder. While no single database listed all these indications, Wikidata  
12 provided an integrated view that enabled seamless query and access across resources. Integrating  
13 drug indication data from these individual data resources was not a trivial process. Both Inxight and  
14 NDF-RT mint their own identifiers for both drugs and diseases. FAERS uses Medical Dictionary for  
15 Regulatory Activities (MedDRA) names for diseases and free-text names for drugs [72]. By harmonizing  
16 and integrating all resources in the context of Wikidata, we ensure that those data are immediately  
17 usable by others without having to repeat the normalization process. Moreover, by harmonizing data at  
18 the time of data loading, consumers of that data do not need to perform the repetitive and redundant  
19 work at the point of querying and analysis.

20  
21 As the biomedical data within Wikidata continues to grow, we believe that its unencumbered use will  
22 spur the development of many new innovative tools and analyses. These innovations will undoubtedly  
23 include the machine learning-based mining of the knowledge graph to predict new relationships (also  
24 referred to as knowledge graph reasoning [73–75]).

25  
26 For those who subscribe to this vision for cultivating a FAIR and open graph of biomedical knowledge,  
27 there are two simple ways to contribute to Wikidata. First, owners of data resources can release their  
28 data using the CC0 declaration. Because Wikidata is released under CC0, it also means that all data  
29 imported in Wikidata must also use CC0-compatible terms (e.g., be in the public domain). For  
30 resources that currently use a restrictive data license primarily for the purposes of enforcing attribution  
31 or citation, we encourage the transition to "CC0 (+BY)", a model that "[pairs] a permissive license with a  
32 strong moral entreaty" [76]. For resources that must retain data license restrictions, consider releasing  
33 a subset of data or older versions of data using CC0. Many biomedical resources were created under  
34 or transitioned to CC0 (in part or in full) in recent years [77], including the Disease Ontology [34], Pfam  
35 [78], Bgee [79], WikiPathways [32], Reactome [31], ECO [80], and CIViC [19].

36  
37 Second, informaticians can contribute to Wikidata by adding the results of data parsing and integration  
38 efforts to Wikidata. Currently, the useful lifespan of data integration code typically does not extend  
39 beyond the immediate project-specific use. As a result, that same data integration process is likely  
40 being done repetitively and redundantly by other informaticians elsewhere. If every informatician  
41 contributed the output of their effort to Wikidata, the resulting knowledge graph would be far more  
42 useful than the stand-alone contribution of any single individual, and it would continually improve in  
43 both breadth and depth over time.

44



1 FAIR and open access to the sum total of biomedical knowledge will improve the efficiency of  
2 biomedical research. Capturing that information in a centralized knowledge graph is useful for  
3 experimental researchers, informatics tool developers and biomedical data scientists. As a  
4 continuously-updated and collaboratively-maintained community resource, we believe that Wikidata has  
5 made significant strides toward achieving this ambitious goal.  
6

## 7 Acknowledgments

8 The authors thank the thousands of Wikidata contributors for curating knowledge, both directly related  
9 and unrelated to this work. The authors also thank the Wikimedia Foundation developers and  
10 administrators for maintaining Wikidata as a community resource. This work has been supported by  
11 grants from the National Institute for General Medical Science (NIGMS) under awards R01 GM089820  
12 to AS, U54 GM114833 to AS and HH, and R01 GM100039 to AP. MG is supported by the National  
13 Human Genome Research Institute (NHGRI) of the NIH under Award Number R00HG007940, the  
14 National Cancer Institute under Award Number U24CA237719 and the V Foundation for Cancer  
15 Research under Award Number V2018-007. KH was supported by the National Institute of Allergy and  
16 Infectious Diseases (NIAID) under award R01 AI126785 Additional support was provided by the  
17 National Center for Advancing Translational Sciences (NCATS) under award UL1 TR002550.  
18

## 19 Competing interests

20 The authors have no competing interests.

## References

1. Wilkinson MD, Dumontier M, Aalbersberg IJJ, Appleton G, Axton M, Baak A, Blomberg N, Boiten J-W, da Silva Santos LB, Bourne PE, Bouwman J, Brookes AJ, Clark T, Crosas M, Dillo I, Dumon O, Edmunds S, Evelo CT, Finkers R, Gonzalez-Beltran A, Gray AJG, Groth P, Goble C, Grethe JS, Heringa J, 't Hoen PAC, Hooft R, Kuhn T, Kok R, Kok J, Lusher SJ, Martone ME, Mons A, Packer AL, Persson B, Rocca-Serra P, Roos M, van Schaik R, Sansone S-A, Schultes E, Sengstag T, Slater T, Strawn G, Swertz MA, Thompson M, van der Lei J, van Mulligen E, Velterop J, Waagmeester A, Wittenburg P, Wolstencroft K, Zhao J, Mons B. The FAIR Guiding Principles for scientific data management and stewardship. *Sci Data*. 2016 Mar 15;3:160018. PMID: PMC4792175
2. Evaluating FAIR Maturity Through a Scalable, Automated, Community-Governed Framework | bioRxiv [Internet]. [cited 2019 Jul 31]. Available from: <https://www.biorxiv.org/content/10.1101/649202v1>
3. Mungall CJ, McMurry JA, Köhler S, Balhoff JP, Borromeo C, Brush M, Carbon S, Conlin T, Dunn N, Engelstad M, Foster E, Gouridine JP, Jacobsen JOB, Keith D, Laraway B, Lewis SE, NguyenXuan J, Shefchek K, Vasilevsky N, Yuan Z, Washington N, Hochheiser H, Groza T, Smedley D, Robinson PN, Haendel MA. The Monarch Initiative: an integrative data and analytic platform connecting phenotypes to genotypes across species. *Nucleic Acids Res*. 2017 04;45(D1):D712–D722. PMID: PMC5210586
4. Gabella C, Durinx C, Appel R. Funding knowledgebases: Towards a sustainable funding model for the UniProt use case. *F1000Research* [Internet]. 2018 Mar 22 [cited 2019 Aug 26];6. Available from: <https://www.ncbi.nlm.nih.gov/pmc/articles/PMC5747334/> PMID: PMC5747334
5. Chandras C, Weaver T, Zouberakis M, Smedley D, Schughart K, Rosenthal N, Hancock JM, Kollias G, Schofield PN, Aidinis V. Models for financial sustainability of biological databases and resources. *Database* [Internet]. 2009 Jan 1 [cited 2019 Aug 26];2009. Available from: <https://academic.oup.com/database/article/doi/10.1093/database/bap017/357253>
6. Vrandečić D. Wikidata: A New Platform for Collaborative Data Collection. *Proc 21st Int Conf World Wide Web* [Internet]. New York, NY, USA: ACM; 2012 [cited 2019 Aug 1]. p. 1063–1064. Available from: <http://doi.acm.org/10.1145/2187980.2188242>
7. Wikidata Statistics [Internet]. [cited 2019 Sep 11]. Available from: <https://tools.wmflabs.org/wikidata-todo/stats.php>
8. Mora-Cantalops M, Sánchez-Alonso S, García-Barriocanal E. A systematic literature review on Wikidata. *Data Technol Appl* [Internet]. 2019 Jul 1 [cited 2019 Sep 6]; Available from: <https://www.emerald.com/insight/content/doi/10.1108/DTA-12-2018-0110/full/html>
9. Wikidata Query Service [Internet]. [cited 2019 Jul 31]. Available from: <https://query.wikidata.org/>
10. Burgstaller-Muehlbacher S, Waagmeester A, Mitraka E, Turner J, Putman T, Leong J, Naik C, Pavlidis P, Schriml L, Good BM, Su AI. Wikidata as a semantic framework for the Gene Wiki initiative. *Database J Biol Databases Curation*. 2016;2016. PMID: PMC4795929
11. Willighagen E, Slenter D, Mietchen D, Evelo C, Nielsen F. Wikidata and Scholia as a hub linking chemical knowledge [Internet]. 2018 [cited 2019 Aug 23]. Available from:

[https://figshare.com/articles/Wikidata\\_and\\_Scholia\\_as\\_a\\_hub\\_linking\\_chemical\\_knowledge/6356027](https://figshare.com/articles/Wikidata_and_Scholia_as_a_hub_linking_chemical_knowledge/6356027)

12. Turki H, Shafee T, Taieb MAH, Aouicha MB, Vrandečić D, Das D, Hamdi H. Wikidata: A large-scale collaborative ontological medical database. *J Biomed Inform.* 2019 Sep 23;103292.
13. Putman TE, Lelong S, Burgstaller-Muehlbacher S, Waagmeester A, Diesh C, Dunn N, Munoz-Torres M, Stupp GS, Wu C, Su AI, Good BM. WikiGenomes: an open web application for community consumption and curation of gene annotation data in Wikidata. *Database J Biol Databases Curation.* 2017 01;2017(1). PMID: PMC5467579
14. NCBI Resource Coordinators. Database resources of the National Center for Biotechnology Information. *Nucleic Acids Res.* 2018 04;46(D1):D8–D13. PMID: PMC5753372
15. Zerbino DR, Achuthan P, Akanni W, Amode MR, Barrell D, Bhai J, Billis K, Cummins C, Gall A, Girón CG, Gil L, Gordon L, Haggerty L, Haskell E, Hourlier T, Izuogu OG, Janacek SH, Juettemann T, To JK, Laird MR, Lavidas I, Liu Z, Loveland JE, Maurel T, McLaren W, Moore B, Mudge J, Murphy DN, Newman V, Nuhn M, Ogeh D, Ong CK, Parker A, Patricio M, Riat HS, Schuilenburg H, Sheppard D, Sparrow H, Taylor K, Thormann A, Vullo A, Walts B, Zadissa A, Frankish A, Hunt SE, Kostadima M, Langridge N, Martin FJ, Muffato M, Perry E, Ruffier M, Staines DM, Trevanion SJ, Aken BL, Cunningham F, Yates A, Flicek P. Ensembl 2018. *Nucleic Acids Res.* 2018 04;46(D1):D754–D761. PMID: PMC5753206
16. UniProt: a worldwide hub of protein knowledge. *Nucleic Acids Res.* 2019 Jan 8;47(D1):D506–D515.
17. Mitchell AL, Attwood TK, Babbitt PC, Blum M, Bork P, Bridge A, Brown SD, Chang H-Y, El-Gebali S, Fraser MI, Gough J, Haft DR, Huang H, Letunic I, Lopez R, Luciani A, Madeira F, Marchler-Bauer A, Mi H, Natale DA, Necci M, Nuka G, Orengo C, Pandurangan AP, Paysan-Lafosse T, Pesseat S, Potter SC, Qureshi MA, Rawlings ND, Redaschi N, Richardson LJ, Rivoire C, Salazar GA, Sangrador-Vegas A, Sigrist CJA, Sillitoe I, Sutton GG, Thanki N, Thomas PD, Tosatto SCE, Yong S-Y, Finn RD. InterPro in 2019: improving coverage, classification and access to protein sequence annotations. *Nucleic Acids Res.* 2019 Jan 8;47(D1):D351–D360.
18. Burley SK, Berman HM, Bhikadiya C, Bi C, Chen L, Costanzo LD, Christie C, Duarte JM, Dutta S, Feng Z, Ghosh S, Goodsell DS, Green RK, Guranovic V, Guzenko D, Hudson BP, Liang Y, Lowe R, Peisach E, Periskova I, Randle C, Rose A, Sekharan M, Shao C, Tao Y-P, Valasatava Y, Voigt M, Westbrook J, Young J, Zardecki C, Zhuravleva M, Kurisu G, Nakamura H, Kengaku Y, Cho H, Sato J, Kim JY, Ikegawa Y, Nakagawa A, Yamashita R, Kudou T, Bekker G-J, Suzuki H, Iwata T, Yokochi M, Kobayashi N, Fujiwara T, Velankar S, Kleywegt GJ, Anyango S, Armstrong DR, Berrisford JM, Conroy MJ, Dana JM, Deshpande M, Gane P, Gáborová R, Gupta D, Gutmanas A, Koča J, Mak L, Mir S, Mukhopadhyay A, Nadzirin N, Nair S, Patwardhan A, Paysan-Lafosse T, Pravda L, Salih O, Sehnal D, Varadi M, Vařeková R, Markley JL, Hoch JC, Romero PR, Baskaran K, Maziuk D, Ulrich EL, Wedell JR, Yao H, Livny M, Ioannidis YE. Protein Data Bank: the single global archive for 3D macromolecular structure data. *Nucleic Acids Res.* 2019 Jan 8;47(D1):D520–D528.
19. Griffith M, Spies NC, Krysiak K, McMichael JF, Coffman AC, Danos AM, Ainscough BJ, Ramirez CA, Rieke DT, Kujan L, Barnell EK, Wagner AH, Skidmore ZL, Wollam A, Liu CJ, Jones MR, Bilski RL, Lesurf R, Feng Y-Y, Shah NM, Bonakdar M, Trani L, Matlock M, Ramu A, Campbell KM, Spies GC, Graubert AP, Gangavarapu K, Eldred JM, Larson DE, Walker JR, Good BM, Wu C, Su

- Al, Dienstmann R, Margolin AA, Tamborero D, Lopez-Bigas N, Jones SJM, Bose R, Spencer DH, Wartman LD, Wilson RK, Mardis ER, Griffith OL. CIViC is a community knowledgebase for expert crowdsourcing the clinical interpretation of variants in cancer. *Nat Genet.* 2017 Jan 31;49(2):170–174. PMID: PMC5367263
20. Wang Y, Xiao J, Suzek TO, Zhang J, Wang J, Bryant SH. PubChem: a public information system for analyzing bioactivities of small molecules. *Nucleic Acids Res.* 2009 Jul 1;37(suppl\_2):W623–W633.
  21. Nelson SJ, Zeng K, Kilbourne J, Powell T, Moore R. Normalized names for clinical drugs: RxNorm at 6 years. *J Am Med Inform Assoc.* 2011 Jul 1;18(4):441–448.
  22. Harding SD, Sharman JL, Faccenda E, Southan C, Pawson AJ, Ireland S, Gray AJG, Bruce L, Alexander SPH, Anderton S, Bryant C, Davenport AP, Doerig C, Fabbro D, Levi-Schaffer F, Spedding M, Davies JA, NC-IUPHAR. The IUPHAR/BPS Guide to PHARMACOLOGY in 2018: updates and expansion to encompass the new guide to IMMUNOPHARMACOLOGY. *Nucleic Acids Res.* 2018 04;46(D1):D1091–D1106. PMID: PMC5753190
  23. Southan C, Sharman JL, Benson HE, Faccenda E, Pawson AJ, Alexander SPH, Buneman OP, Davenport AP, McGrath JC, Peters JA, Spedding M, Catterall WA, Fabbro D, Davies JA, NC-IUPHAR. The IUPHAR/BPS Guide to PHARMACOLOGY in 2016: towards curated quantitative interactions between 1300 protein targets and 6000 ligands. *Nucleic Acids Res.* 2016 Jan 4;44(D1):D1054-1068. PMID: PMC4702778
  24. Pawson AJ, Sharman JL, Benson HE, Faccenda E, Alexander SPH, Buneman OP, Davenport AP, McGrath JC, Peters JA, Southan C, Spedding M, Yu W, Harmar AJ, NC-IUPHAR. The IUPHAR/BPS Guide to PHARMACOLOGY: an expert-driven knowledgebase of drug targets and their ligands. *Nucleic Acids Res.* 2014 Jan;42(Database issue):D1098-1106. PMID: PMC3965070
  25. UMLS Metathesaurus - NDFRT (National Drug File - Reference Terminology) - Synopsis [Internet]. [cited 2019 Sep 9]. Available from: <https://www.nlm.nih.gov/research/umls/sourcereleasedocs/current/NDFRT/index.html>
  26. Sud M, Fahy E, Cotter D, Brown A, Dennis EA, Glass CK, Merrill AH, Murphy RC, Raetz CRH, Russell DW, Subramaniam S. LMSD: LIPID MAPS structure database. *Nucleic Acids Res.* 2007 Jan 1;35(suppl\_1):D527–D532.
  27. Horai H, Arita M, Kanaya S, Nihei Y, Ikeda T, Suwa K, Ojima Y, Tanaka K, Tanaka S, Aoshima K, Oda Y, Kakazu Y, Kusano M, Tohge T, Matsuda F, Sawada Y, Hirai MY, Nakanishi H, Ikeda K, Akimoto N, Maoka T, Takahashi H, Ara T, Sakurai N, Suzuki H, Shibata D, Neumann S, Iida T, Tanaka K, Funatsu K, Matsuura F, Soga T, Taguchi R, Saito K, Nishioka T. MassBank: a public repository for sharing mass spectral data for life sciences. *J Mass Spectrom.* 2010;45(7):703–714.
  28. Wohlgemuth G, Mehta SS, Mejia RF, Neumann S, Pedrosa D, Pluskal T, Schymanski EL, Willighagen EL, Wilson M, Wishart DS, Arita M, Dorrestein PC, Bandeira N, Wang M, Schulze T, Salek RM, Steinbeck C, Nainala VC, Mistrik R, Nishioka T, Fiehn O. SPLASH, a hashed identifier for mass spectra. *Nat Biotechnol.* 2016 Nov 8;34:1099–1101.

29. Shin J-M, Cho D-H. PDB-Ligand: a ligand database based on PDB for the automated and customized classification of ligand-binding structures. *Nucleic Acids Res.* 2005 Jan 1;33(suppl\_1):D238–D241.
30. Williams AJ, Grulke CM, Edwards J, McEachran AD, Mansouri K, Baker NC, Patlewicz G, Shah I, Wambaugh JF, Judson RS, Richard AM. The CompTox Chemistry Dashboard: a community data resource for environmental chemistry. *J Cheminformatics.* 2017 Nov 28;9(1):61.
31. Fabregat A, Jupe S, Matthews L, Sidiropoulos K, Gillespie M, Garapati P, Haw R, Jassal B, Korninger F, May B, Milacic M, Roca CD, Rothfels K, Sevilla C, Shamovsky V, Shorser S, Varusai T, Viteri G, Weiser J, Wu G, Stein L, Hermjakob H, D'Eustachio P. The Reactome Pathway Knowledgebase. *Nucleic Acids Res.* 2018 Jan 4;46(D1):D649–D655. PMID: PMC5753187
32. Slenter DN, Kutmon M, Hanspers K, Riutta A, Windsor J, Nunes N, Mélius J, Cirillo E, Coort SL, Digles D, Ehrhart F, Giesbertz P, Kalafati M, Martens M, Miller R, Nishida K, Rieswijk L, Waagmeester A, Eijssen LMT, Evelo CT, Pico AR, Willighagen EL. WikiPathways: a multifaceted pathway database bridging metabolomics to other omics research. *Nucleic Acids Res.* 2018 Jan 4;46(D1):D661–D667. PMID: PMC5753270
33. Sprague ER. ORCID. *J Med Libr Assoc JMLA.* 2017 Apr;105(2):207–208. PMID: PMC5370620
34. Schriml LM, Mitraka E, Munro J, Tauber B, Schor M, Nickle L, Felix V, Jeng L, Bearer C, Lichenstein R, Bisordi K, Campion N, Hyman B, Kurland D, Oates CP, Kibbey S, Sreekumar P, Le C, Giglio M, Greene C. Human Disease Ontology 2018 update: classification, content and workflow expansion. *Nucleic Acids Res.* 2019 Jan 8;47(D1):D955–D962.
35. Ayers P, Mietchen D, Orlowitz J, Proffitt M, Rodlund S, Seiver E, Taraborelli D, Vershbow B. WikiCite 2018-2019: Citations for the sum of all human knowledge [Internet]. 2019 [cited 2019 Sep 6]. Available from: [https://figshare.com/articles/WikiCite\\_2018-2019\\_Citations\\_for\\_the\\_sum\\_of\\_all\\_human\\_knowledge/8947451](https://figshare.com/articles/WikiCite_2018-2019_Citations_for_the_sum_of_all_human_knowledge/8947451)
36. Wikidata:WikiProject Molecular biology - Wikidata [Internet]. [cited 2019 Jul 29]. Available from: [https://www.wikidata.org/wiki/Wikidata:WikiProject\\_Molecular\\_biology](https://www.wikidata.org/wiki/Wikidata:WikiProject_Molecular_biology)
37. A Wikidata Python module integrating the MediaWiki API and the Wikidata SPARQL endpoint: SuLab/WikidataIntegrator [Internet]. Su Lab; 2019 [cited 2019 Jul 23]. Available from: <https://github.com/SuLab/WikidataIntegrator>
38. Xin J, Afrasiabi C, Lelong S, Adesara J, Tsueng G, Su AI, Wu C. Cross-linking BioThings APIs through JSON-LD to facilitate knowledge exploration. *BMC Bioinformatics.* 2018 01;19(1):30. PMID: PMC5796402
39. van Iersel MP, Pico AR, Kelder T, Gao J, Ho I, Hanspers K, Conklin BR, Evelo CT. The BridgeDb framework: standardized access to gene, protein and metabolite identifier mapping services. *BMC Bioinformatics.* 2010 Jan 4;11(1):5.
40. Smedley D, Haider S, Durinck S, Pandini L, Provero P, Allen J, Arnaiz O, Awedh MH, Baldock R, Barbiera G, Bardou P, Beck T, Blake A, Bonierbale M, Brookes AJ, Bucci G, Buetti I, Burge S, Cabau C, Carlson JW, Chelala C, Chrysostomou C, Cittaro D, Collin O, Cordova R, Cutts RJ, Dassi E, Genova AD, Djari A, Esposito A, Estrella H, Eyraas E, Fernandez-Banet J, Forbes S, Free RC, Fujisawa T, Gadaleta E, Garcia-Manteiga JM, Goodstein D, Gray K, Guerra-Assunção JA,



Haggarty B, Han D-J, Han BW, Harris T, Harshbarger J, Hastings RK, Hayes RD, Hoede C, Hu S, Hu Z-L, Hutchins L, Kan Z, Kawaji H, Keliet A, Kerhornou A, Kim S, Kinsella R, Klopp C, Kong L, Lawson D, Lazarevic D, Lee J-H, Letellier T, Li C-Y, Lio P, Liu C-J, Luo J, Maass A, Mariette J, Maurel T, Merella S, Mohamed AM, Moreews F, Nabihoudine I, Ndegwa N, Noirot C, Perez-Llamas C, Primig M, Quattrone A, Quesneville H, Rambaldi D, Reecy J, Riba M, Rosanoff S, Saddiq AA, Salas E, Sallou O, Shepherd R, Simon R, Sperling L, Spooner W, Staines DM, Steinbach D, Stone K, Stupka E, Teague JW, Dayem Ullah AZ, Wang J, Ware D, Wong-Erasmus M, Youens-Clark K, Zadissa A, Zhang S-J, Kasprzyk A. The BioMart community portal: an innovative alternative to large, centralized data repositories. *Nucleic Acids Res.* 2015 Jul 1;43(W1):W589–W598.

41. Bodenreider O. The Unified Medical Language System (UMLS): integrating biomedical terminology. *Nucleic Acids Res.* 2004 Jan 1;32(Database issue):D267-270. PMID: PMC308795
42. de Coronado S, Wright LW, Fragoso G, Haber MW, Hahn-Dantona EA, Hartel FW, Quan SL, Safran T, Thomas N, Whiteman L. The NCI Thesaurus quality assurance life cycle. *J Biomed Inform.* 2009 Jun;42(3):530–539. PMID: 19475726
43. List of Properties - Wikidata [Internet]. [cited 2019 Aug 23]. Available from: <https://www.wikidata.org/wiki/Special:ListProperties>
44. Gil Y, Garijo D, Ratnakar V, Khider D, Emile-Geay J, McKay N. A Controlled Crowdsourcing Approach for Practical Ontology Extensions and Metadata Annotations. In: d'Amato C, Fernandez M, Tamma V, Lecue F, Cudré-Mauroux P, Sequeda J, Lange C, Heflin J, editors. *Semantic Web – ISWC 2017*. Springer International Publishing; 2017. p. 231–246.
45. Bunt SM, Grumbling GB, Field HI, Marygold SJ, Brown NH, Millburn GH, FlyBase Consortium. Directly e-mailing authors of newly published papers encourages community curation. *Database J Biol Databases Curation.* 2012;2012:bas024. PMID: PMC3342516
46. Wang M, Carver JJ, Phelan VV, Sanchez LM, Garg N, Peng Y, Nguyen DD, Watrous J, Kapono CA, Luzzatto-Knaan T, Porto C, Bouslimani A, Melnik AV, Meehan MJ, Liu W-T, Crüsemann M, Boudreau PD, Esquenazi E, Sandoval-Calderón M, Kersten RD, Pace LA, Quinn RA, Duncan KR, Hsu C-C, Floros DJ, Gavilan RG, Kleigrew K, Northen T, Dutton RJ, Parrot D, Carlson EE, Aigle B, Michelsen CF, Jelsbak L, Sohlenkamp C, Pevzner P, Edlund A, McLean J, Piel J, Murphy BT, Gerwick L, Liaw C-C, Yang Y-L, Humpf H-U, Maansson M, Keyzers RA, Sims AC, Johnson AR, Sidebottom AM, Sedio BE, Klitgaard A, Larson CB, Boya P CA, Torres-Mendoza D, Gonzalez DJ, Silva DB, Marques LM, Demarque DP, Pociute E, O'Neill EC, Briand E, Helfrich EJN, Granatosky EA, Glukhov E, Ryffel F, Houson H, Mohimani H, Kharbush JJ, Zeng Y, Vorholt JA, Kurita KL, Charusanti P, McPhail KL, Nielsen KF, Vuong L, Elfeki M, Traxler MF, Eugene N, Koyama N, Vining OB, Baric R, Silva RR, Mascuch SJ, Tomasi S, Jenkins S, Macherla V, Hoffman T, Agarwal V, Williams PG, Dai J, Neupane R, Gurr J, Rodríguez AMC, Lamsa A, Zhang C, Dorrestein K, Duggan BM, Almaliti J, Allard P-M, Phapale P, Nothias L-F, Alexandrov T, Litaudon M, Wolfender J-L, Kyle JE, Metz TO, Peryea T, Nguyen D-T, VanLeer D, Shinn P, Jadhav A, Müller R, Waters KM, Shi W, Liu X, Zhang L, Knight R, Jensen PR, Palsson BØ, Pogliano K, Lington RG, Gutiérrez M, Lopes NP, Gerwick WH, Moore BS, Dorrestein PC, Bandeira N. Sharing and community curation of mass spectrometry data with Global Natural Products Social Molecular Networking. *Nat Biotechnol.* 2016 Aug;34(8):828–837.

47. Putman T, Hybiske K, Jow D, Afrasiabi C, Lelong S, Cano MA, Stupp GS, Waagmeester A, Good BM, Wu C, Su AI. ChlamBase: a curated model organism database for the Chlamydia research community. Database J Biol Databases Curation. 2019 01;2019. PMID: PMC6580685
48. Lewis J, Snyder M, Hyatt-Knorr H. Marking 15 years of the Genetic and Rare Diseases Information Center. Transl Sci Rare Dis. 2017 May 25;2(1–2):77–88. PMID: PMC5685198
49. Medical Subject Headings - Home Page [Internet]. [cited 2019 Aug 27]. Available from: <https://www.nlm.nih.gov/mesh/meshhome.html>
50. Maiella S, Olry A, Hanauer M, Lanneau V, Lourghi H, Donadille B, Rodwell C, Köhler S, Seelow D, Jupp S, Parkinson H, Groza T, Brudno M, Robinson PN, Rath A. Harmonising phenomics information for a better interoperability in the rare disease field. Eur J Med Genet. 2018 Nov;61(11):706–714. PMID: 29425702
51. Amberger JS, Hamosh A. Searching Online Mendelian Inheritance in Man (OMIM): A Knowledgebase of Human Genes and Genetic Phenotypes. Curr Protoc Bioinforma. 2017 27;58:1.2.1-1.2.12. PMID: PMC5662200
52. McKusick VA. Mendelian Inheritance in Man and its online version, OMIM. Am J Hum Genet. 2007 Apr;80(4):588–604. PMID: PMC1852721
53. GeneWiki Scheduled Bots. Contribute to SuLab/scheduled-bots development by creating an account on GitHub [Internet]. Su Lab; 2019 [cited 2019 Aug 23]. Available from: <https://github.com/SuLab/scheduled-bots>
54. fnielsen/scholia [Internet]. GitHub. [cited 2019 Sep 27]. Available from: <https://github.com/fnielsen/scholia>
55. Scholia [Internet]. [cited 2019 Oct 1]. Available from: <https://tools.wmflabs.org/scholia/pathway/>
56. Tool information: pathway-viewer - Wikimedia Toolforge [Internet]. [cited 2019 Sep 27]. Available from: <https://tools.wmflabs.org/admin/tool/pathway-viewer>
57. Scholia, ACE Inhibitor Pathway [Internet]. Available from: <https://tools.wmflabs.org/scholia/pathway/Q29892242>
58. Köhler S, Vasilevsky NA, Engelstad M, Foster E, McMurry J, Aymé S, Baynam G, Bello SM, Boerkoel CF, Boycott KM, Brudno M, Buske OJ, Chinnery PF, Cipriani V, Connell LE, Dawkins HJS, DeMare LE, Devereau AD, de Vries BBA, Firth HV, Freson K, Greene D, Hamosh A, Helbig I, Hum C, Jähn JA, James R, Krause R, F. Laulederkind SJ, Lochmüller H, Lyon GJ, Ogishima S, Olry A, Ouwehand WH, Pontikos N, Rath A, Schaefer F, Scott RH, Segal M, Sergouniotis PI, Sever R, Smith CL, Straub V, Thompson R, Turner C, Turro E, Veltman MWM, Vulliamy T, Yu J, von Ziegenweid J, Zankl A, Züchner S, Zemojtel T, Jacobsen JOB, Groza T, Smedley D, Mungall CJ, Haendel M, Robinson PN. The Human Phenotype Ontology in 2017. Nucleic Acids Res. 2017 Jan 4;45(D1):D865–D876.
59. Köhler S, Schulz MH, Krawitz P, Bauer S, Dölken S, Ott CE, Mundlos C, Horn D, Mundlos S, Robinson PN. Clinical diagnostics in human genetics with semantic similarity searches in ontologies. Am J Hum Genet. 2009 Oct;85(4):457–464. PMID: PMC2756558

60. Bayesian ontology querying from Bauer et al. Contribute to SuLab/boqa development by creating an account on GitHub [Internet]. Su Lab; 2018 [cited 2019 Jul 23]. Available from: <https://github.com/SuLab/boqa>
61. Incorporate wikidata statements into phenomizer. Contribute to SuLab/Wikidata-phenomizer development by creating an account on GitHub [Internet]. Su Lab; 2019 [cited 2019 Jul 23]. Available from: <https://github.com/SuLab/Wikidata-phenomizer>
62. Caglayan AO, Comu S, Baranoski JF, Parman Y, Kaymakçalan H, Akgumus GT, Caglar C, Dolen D, Erson-Omay EZ, Harmanci AS, Mishra-Gorur K, Freeze HH, Yasuno K, Bilguvar K, Gunel M. NGLY1 mutation causes neuromotor impairment, intellectual disability, and neuropathy. *Eur J Med Genet.* 2015 Jan;58(1):39–43. PMID: PMC4804755
63. Himmelstein DS, Lizee A, Hessler C, Brueggeman L, Chen SL, Hadley D, Green A, Khankhanian P, Baranzini SE. Systematic integration of biomedical knowledge prioritizes drugs for repurposing. *eLife.* 2017 22;6. PMID: PMC5640425
64. Ursu O, Holmes J, Knockel J, Bologa CG, Yang JJ, Mathias SL, Nelson SJ, Oprea TI. DrugCentral: online drug compendium. *Nucleic Acids Res.* 2017 Jan 4;45(D1):D932–D939.
65. Union PO of the E. Turning FAIR into reality : final report and action plan from the European Commission expert group on FAIR data. [Internet]. 2018 [cited 2019 Aug 23]. Available from: <https://publications.europa.eu/en/publication-detail/-/publication/7769a148-f1f6-11e8-9982-01aa75ed71a1/language-en/format-PDF>
66. Sansone S-A, McQuilton P, Rocca-Serra P, Gonzalez-Beltran A, Izzo M, Lister AL, Thurston M. FAIRsharing as a community approach to standards, repositories and policies. *Nat Biotechnol.* 2019 Apr;37(4):358–367.
67. Wimalaratne SM, Juty N, Kunze J, Janée G, McMurry JA, Beard N, Jimenez R, Grethe JS, Hermjakob H, Martone ME, Clark T. Uniform resolution of compact identifiers for biomedical data. *Sci Data.* 2018 May 8;5:180029.
68. Wikidata:Database download - Wikidata [Internet]. [cited 2019 Aug 8]. Available from: [https://www.wikidata.org/wiki/Wikidata:Database\\_download](https://www.wikidata.org/wiki/Wikidata:Database_download)
69. Jacobsen A. Wikidata as an intuitive resource towards semantic data modeling in data FAIRification. 2018; Available from: <http://ceur-ws.org/Vol-2275/short1.pdf>
70. Creative Commons — CC0 1.0 Universal [Internet]. [cited 2019 Aug 8]. Available from: <https://creativecommons.org/publicdomain/zero/1.0/>
71. Reiser L, Berardini TZ, Li D, Muller R, Strait EM, Li Q, Mezheritsky Y, Vetushko A, Huala E. Sustainable funding for biocuration: The Arabidopsis Information Resource (TAIR) as a case study of a subscription-based funding model. *Database J Biol Databases Curation.* 2016;2016. PMID: PMC4795935
72. Stupp GS, Su AI. Drug Indications Extracted from FAERS [Internet]. Zenodo; 2018 [cited 2019 Jun 27]. Available from: <https://zenodo.org/record/1436000#.XRVY5-hKguU>

73. Das R, Dhuliawala S, Zaheer M, Vilnis L, Durugkar I, Krishnamurthy A, Smola A, McCallum A. Go for a Walk and Arrive at the Answer: Reasoning Over Paths in Knowledge Bases using Reinforcement Learning. ArXiv171105851 Cs [Internet]. 2017 Nov 15 [cited 2019 May 6]; Available from: <http://arxiv.org/abs/1711.05851>
74. Xiong W, Hoang T, Wang WY. DeepPath: A Reinforcement Learning Method for Knowledge Graph Reasoning. ArXiv170706690 Cs [Internet]. 2017 Jul 20 [cited 2019 May 6]; Available from: <http://arxiv.org/abs/1707.06690>
75. Lin XV, Socher R, Xiong C. Multi-Hop Knowledge Graph Reasoning with Reward Shaping. ArXiv180810568 Cs [Internet]. 2018 Aug 30 [cited 2019 May 6]; Available from: <http://arxiv.org/abs/1808.10568>
76. CC0 (+BY) – Dan Cohen [Internet]. [cited 2019 Aug 8]. Available from: <https://dancohen.org/2013/11/26/cc0-by/>
77. FAIRsharing [Internet]. [cited 2019 Jan 25]. Available from: <https://fairsharing.org/>
78. El-Gebali S, Mistry J, Bateman A, Eddy SR, Luciani A, Potter SC, Qureshi M, Richardson LJ, Salazar GA, Smart A, Sonnhammer ELL, Hirsh L, Paladin L, Piovesan D, Tosatto SCE, Finn RD. The Pfam protein families database in 2019. *Nucleic Acids Res.* 2019 Jan 8;47(D1):D427–D432.
79. Bastian F, Parmentier G, Roux J, Moretti S, Laudet V, Robinson-Rechavi M. Bgee: Integrating and Comparing Heterogeneous Transcriptome Data Among Species. In: Bairoch A, Cohen-Boulakia S, Froidevaux C, editors. *Data Integr Life Sci.* Springer Berlin Heidelberg; 2008. p. 124–131.
80. Chibucos MC, Mungall CJ, Balakrishnan R, Christie KR, Huntley RP, White O, Blake JA, Lewis SE, Giglio M. Standardized description of scientific evidence using the Evidence Ontology (ECO). Database [Internet]. 2014 Jan 1 [cited 2019 Aug 8];2014. Available from: <https://academic.oup.com/database/article/doi/10.1093/database/bau075/2634798>
