## Wikidata as a FAIR knowledge graph for the life sciences

Andra Waagmeester<sup>1,\*</sup>, Gregory Stupp<sup>2,\*</sup>, Sebastian Burgstaller-Muehlbacher<sup>3,¶</sup>, Benjamin M. Good<sup>2</sup>, Malachi Griffith<sup>4</sup>, Obi Griffith<sup>4</sup>, Kristina Hanspers<sup>5</sup>, Henning Hermjakob<sup>6</sup>, Toby S. Hudson<sup>7</sup>, Kevin Hybiske<sup>8</sup>, Sarah M. Keating<sup>6</sup>, Magnus Manske<sup>9</sup>, Michael Mayers<sup>2</sup>, Daniel Mietchen<sup>10</sup>, Elvira Mitra<sup>11</sup>, Alexander R. Pico<sup>5</sup>, Timothy Putman<sup>2</sup>, Anders Riutta<sup>5</sup>, N ria Queralt-Rosinach<sup>2</sup>, Lynn M. Schriml<sup>11</sup>, Thomas Shafee<sup>12</sup>, Denise Slenter<sup>13</sup>, Ralf Stephan<sup>14</sup>, Katherine Thornton<sup>15</sup>, Ginger Tsueng<sup>2</sup>, Roger Tu<sup>2</sup>, Sabah U-Hasan<sup>2</sup>, Egon Willighagen<sup>13</sup>, Chunlei Wu<sup>2</sup>, Andrew I. Su<sup>2,§</sup>

1 Micelio, Antwerp 2180, Belgium

2 Department of Integrative Structural and Computational Biology, The Scripps Research Institute, La Jolla, CA, USA

3 Center for Integrative Bioinformatics Vienna, Max Perutz Laboratories, University of Vienna and Medical University of Vienna, Dr. Bohr-Gasse 9, 1030 Vienna, Austria

4 McDonnell Genome Institute, Washington University School of Medicine, St. Louis, MO, USA

5 Institute of Data Science and Biotechnology, Gladstone Institutes, San Francisco, CA, USA

6 European Molecular Biology Laboratory, European Bioinformatics Institute (EMBL-EBI), Wellcome Trust Genome Campus, CB10 1SD, Hinxton, United Kingdom

7 School of Chemistry, The University of Sydney, Australia

8 Division of Allergy and Infectious Diseases, Department of Medicine, University of Washington, Seattle, WA, USA

9 Wellcome Trust Sanger Institute, Hinxton, Cambridge CB10 1SA, UK

10 School of Data Science, University of Virginia, Charlottesville, Virginia, USA

11 University of Maryland School of Medicine, Baltimore, Maryland, USA.

12 Department of Animal Plant and Soil Sciences, La Trobe University, Melbourne, Australia

13 Department of Bioinformatics-BiGCaT, NUTRIM, Maastricht University, 6229 ER Maastricht, The Netherlands

14 Unaffiliated

15 Yale University Library, New Haven, Connecticut, USA

(\*) equal contributions

(§) Correspondence: [asu@scripps.edu](mailto:asu@scripps.edu)

**ORCID identifiers:**

|                                                        |                                             |
|--------------------------------------------------------|---------------------------------------------|
| Andra Waagmeester, 0000-0001-9773-4008                 | Alexander R. Pico 0000-0001-5706-2163       |
| Gregory Stupp, 0000-0002-0644-7212                     | Timothy Putman, 0000-0002-4291-0737         |
| Sebastian Burgstaller-Muehlbacher, 0000-0003-4640-3510 | Anders Riutta 0000-0002-4693-0591           |
| Benjamin M. Good, 0000-0002-7334-7852                  | Núria Queralt-Rosinach, 0000-0003-0169-8159 |
| Malachi Griffith, 0000-0002-6388-446X                  | Lynn M. Schriml, 0000-0001-8910-9851        |
| Obi Griffith, 0000-0002-0843-4271                      | Thomas Shafee, 0000-0002-2298-7593          |
| Kristina Hanspers 0000-0001-5410-599X                  | Denise Slenter, 0000-0001-8449-1318         |
| Henning Hermjakob, 0000-0001-8479-0262                 | Ralf Stephan, 0000-0002-4650-631X           |
| Toby S. Hudson, 0000-0002-3348-3622                    | Katherine Thornton, 0000-0002-4499-0451     |
| Kevin Hybiske, 0000-0002-2967-3079                     | Ginger Tsueng, 0000-0001-9536-9115          |
| Sarah M. Keating, 0000-0002-3356-3542                  | Roger Tu, 0000-0002-7899-1604               |
| Magnus Manske, 0000-0001-5916-0947                     | Sabah Ul-Hasan, 0000-0001-6334-452X         |
| Michael Mayers, 0000-0002-7792-0150                    | Egon Willighagen, 0000-0001-7542-0286       |
| Daniel Mietchen, 0000-0001-9488-1870                   | Chunlei Wu, 0000-0002-2629-6124             |
| Elvira Mitraha, 0000-0003-0719-3485                    | Andrew I. Su, 0000-0002-9859-4104           |

1

2

## 1 Abstract

2 Wikidata is a community-maintained knowledge base that epitomizes the FAIR principles of Findability,  
3 Accessibility, Interoperability, and Reusability. Here, we describe the breadth and depth of biomedical  
4 knowledge contained within Wikidata, assembled from primary knowledge repositories on genomics,  
5 proteomics, genetic variants, pathways, chemical compounds, and diseases. We built a collection of  
6 open-source tools that simplify the addition and synchronization of Wikidata with source databases. We  
7 furthermore demonstrate several use cases of how the continuously updated, crowd-contributed  
8 knowledge in Wikidata can be mined. These use cases cover a diverse cross section of biomedical  
9 analyses, from crowdsourced curation of biomedical ontologies, to phenotype-based diagnosis of  
10 disease, to drug repurposing.

## 11 Introduction

12 Integrating data and knowledge is a formidable challenge in biomedical research. Although new  
13 scientific findings are being discovered at a rapid pace, a large proportion of that knowledge is either  
14 locked in data silos (where integration is hindered by differing nomenclature, data models, and licensing  
15 terms) [1], or even worse, locked away in free-text. The lack of an integrated and structured version of  
16 biomedical knowledge hinders efficient querying or mining of that information, a limitation that prevents  
17 the full utilization of our accumulated scientific knowledge.

18  
19 Recently, there has been a growing emphasis within the scientific community to ensure all scientific  
20 data are FAIR – Findable, Accessible, Interoperable, and Reusable – and there is a growing consensus  
21 around a concrete set of principles to ensure FAIRness [1,2]. Widespread implementation of these  
22 principles would greatly advance open data efforts to build a rich and heterogeneous network of  
23 scientific knowledge. That knowledge network could, in turn, be the foundation for many computational  
24 tools, applications and analyses.

25  
26 Most data and knowledge integration initiatives fall on either end of a spectrum. At one end, centralized  
27 efforts seek to bring multiple knowledge sources into a single database instance (e.g., [3]). This  
28 approach has the advantage of data alignment according to a common data model and of enabling high  
29 performance queries. However, centralized resources are very difficult and expensive to maintain and  
30 expand [4,5], in large part because of limited bandwidth and resources of the technical team and the  
31 bottlenecks that introduces.

32  
33 At the other end of the spectrum, distributed approaches to data integration leave in place a broad  
34 landscape of individual resources, focusing on technical infrastructure to query and integrate across  
35 them for each query. These approaches lower the barriers to adding new data by enabling anyone to  
36 publish data by following community standards. However, performance is often an issue when each  
37 query must be sent to many individual databases, and the performance of the system as a whole is  
38 highly dependent on the stability and performance of each individual component. In addition, data  
39 integration requires harmonizing the differences in the data models and data formats between

1 resources, a process that can often require significant skill and effort. Moreover, harmonizing  
2 differences in data licensing can sometimes be impossible.

3  
4 Here we explore the use of Wikidata (<https://www.wikidata.org>) [6] as a platform for knowledge  
5 integration in the life sciences. Wikidata is an openly-accessible knowledge base that is editable by  
6 anyone. Like its sister project Wikipedia, the scope of Wikidata is nearly boundless, with items on topics  
7 as diverse as books, actors, historical events, and galaxies. Unlike Wikipedia, Wikidata focuses on  
8 representing knowledge in a structured format instead of primarily free text. As of September 2019,  
9 Wikidata's knowledge graph included over 750 million statements on 61 million items [7]. Wikidata also  
10 became the first Wikimedia project that surpassed one billion edits, achieved by its community of 12  
11 thousand active users, including 100 active computational 'bots' (**Supplemental Figure 1**). Since its  
12 inception in 2012, the Wikidata knowledge graph has resulted in broad visibility within both tech and  
13 academic circles [8]. Wikidata is run by the Wikimedia Foundation (<https://wikimediafoundation.org>), an  
14 organization that has a long track record of developing and maintaining widely-used web applications  
15 (including Wikipedia).

16  
17 As a knowledge integration platform, Wikidata combines several of the key strengths of the centralized  
18 and distributed approaches. A large portion of the Wikidata knowledge graph is based on the  
19 automated imports of large structured databases via Wikidata bots, thereby breaking down the walls of  
20 existing data silos. Since Wikidata is also based on a community-editing model, it harnesses the  
21 distributed efforts of a worldwide community of contributors, including both domain experts and bot  
22 developers. Anyone is empowered to add new statements, ranging from individual facts to large-scale  
23 data imports. Finally, all knowledge in Wikidata is queryable through a SPARQL query interface [9],  
24 which also enables distributed queries across other Linked Data resources.

25  
26 In previous work, we seeded Wikidata with content from public and authoritative resources on  
27 structured knowledge on genes and proteins [10] and chemical compounds [11]. Here, we describe  
28 progress on expanding and enriching the biomedical knowledge graph within Wikidata, both by our  
29 team and by others in the community [12]. We also describe several representative biomedical use  
30 cases on how Wikidata can enable new analyses and improve the efficiency of research. Finally, we  
31 discuss how researchers can contribute to this effort to build a continuously-updated and community-  
32 maintained knowledge graph that epitomizes the FAIR principles.

## 33 Results

### 34 The Wikidata Biomedical Knowledge Graph

35 The original effort behind this work focused on creating and annotating Wikidata items for human and  
36 mouse genes and proteins [10], and was subsequently expanded to include microbial reference  
37 genomes from NCBI RefSeq [13]. Since then, the Wikidata community (including our team) has  
38 significantly expanded the depth and breadth of biological information within Wikidata, resulting in a  
39 rich, heterogeneous knowledge graph (**Figure 1**). Some of the key new data types and resources are  
40 described below.



1 **Figure 1. A simplified class-level diagram of the Wikidata knowledge graph for biomedical entities.** Each box  
2 represents one type of biomedical entity. The header displays the name of that entity type, as well as the count of Wikidata  
3 items of that type. The lower portion of each box displays a partial listing of attributes about each entity type, together with the  
4 count of the number of items with that attribute. Edges between boxes represent the number of Wikidata statements  
5 corresponding to each combination of subject type, predicate, and object type. For clarity, edges for reciprocal relationships  
6 (e.g., "has part" and "part of") are combined into a single edge, and scientific articles (which are widely cited in statement  
7 references) have been omitted. All counts of Wikidata items are current as of September 2019. The most common data  
8 sources cited as references are shown in **Supplemental Table 1**. Data are generated using the code in  
9 <https://github.com/SuLab/genewikiworld> (archived at [14]). A more complete version of this graph diagram can be found at  
10 [https://commons.wikimedia.org/wiki/File:Biomedical\\_Knowledge\\_Graph\\_in\\_Wikidata.svg](https://commons.wikimedia.org/wiki/File:Biomedical_Knowledge_Graph_in_Wikidata.svg).

11  
12  
13  
14 **Genes and proteins.** Wikidata contains items for over 1.1 million genes and 940 thousand proteins  
15 from 201 unique taxa. Annotation data on genes and proteins come from several key databases  
16 including NCBI Gene [15], Ensembl [16], UniProt [17], InterPro [18], and the Protein Data Bank (PDB)  
17 [19]. These annotations include information on protein families, gene functions, protein domains,  
18 genomic location, and orthologs, as well as links to related compounds, diseases, and variants.

19  
20 **Genetic variants.** Annotations on genetic variants are primarily drawn from CIViC  
21 (<http://www.civicdb.org>), an open and community-curated database of cancer variants [20]. Variants are  
22 annotated with their relevance to disease predisposition, diagnosis, prognosis, and drug efficacy.  
23 Wikidata currently contains 1502 items corresponding to human genetic variants, focused on those with  
24 a clear clinical or therapeutic relevance.

25  
26 **Chemical compounds including drugs.** Wikidata has items for over 150 thousand chemical  
27 compounds, including over 3500 items which are specifically designated as medications. Compound  
28 attributes are drawn from a diverse set of databases, including PubChem [21], RxNorm [22], IUPHAR  
29 Guide to Pharmacology [23–25], NDF-RT [26], and LIPID MAPS [27]. These items typically contain  
30 statements describing chemical structure and key physicochemical properties, and links to databases  
31 with experimental data (MassBank [28,29], PDB Ligand [30], etc.) and toxicological information (EPA  
32 CompTox Dashboard [31]). Additionally, these items contain links to compound classes, disease  
33 indications, pharmaceutical products, and protein targets.

34  
35 **Pathways.** Wikidata has items for almost three thousand human biological pathways, primarily from  
36 two established public pathway repositories: Reactome [32] and WikiPathways [33]. The full details of  
37 the different pathways remain with the respective primary sources. Our bots enter data for Wikidata  
38 properties such as pathway name, identifier, organism, and the list of component genes, proteins, and  
39 chemical compounds. Properties for contributing authors (via ORCID properties [34]), descriptions and  
40 ontology annotations are also being added for Wikidata pathway entries.

41  
42 **Diseases.** Wikidata has items for over 16 thousand diseases, the majority of which were created based  
43 on imports from the Human Disease Ontology [35], with additional disease terms added from the  
44 Monarch Disease Ontology [3]. Disease attributes include medical classifications, symptoms, relevant  
45 drugs, as well as subclass relationships to higher-level disease categories. In instances where the

1 Human Disease Ontology specifies a related anatomic region and/or a causative organism (for  
2 infectious diseases), corresponding statements are also added.

3  
4 **References.** Whenever practical, the provenance of each statement added to Wikidata was also added  
5 in a structured format. References are part of the core data model for a Wikidata statement. References  
6 can either cite the primary resource from which the statement was retrieved (including details like  
7 version number of the resource), or they can link to a Wikidata item corresponding to a publication as  
8 provided by a primary resource (as an extension of the WikiCite project [36]), or both. Wikidata  
9 contains over 20 million items corresponding to publications across many domain areas, including a  
10 heavy emphasis on biomedical journal articles.

## 11 Bot automation

12 To programmatically upload biomedical knowledge to Wikidata, we developed a series of computer  
13 programs, or bots. Bot development began by reaching a consensus on data modeling with the  
14 Wikidata community, particularly the Molecular Biology WikiProject [37]. We then coded each bot to  
15 perform data retrieval from a primary resource, data transformation and normalization, and then data  
16 upload via the Wikidata **application programming interface (API)**.

17  
18 We generalized the common code modules into a Python library, called **Wikidata Integrator (WDI)**, to  
19 simplify the process of creating Wikidata bots [38]. Relative to accessing the API directly, WDI has  
20 convenient features that improve the bot development experience. These features include the creation  
21 of items for scientific articles as references, basic detection of data model conflicts, automated  
22 detection of items needing update, detailed logging and error handling, and detection and preservation  
23 of conflicting human edits.

24  
25 Just as important as the initial data upload is the synchronization of updates between the primary  
26 sources and Wikidata. We utilized Jenkins, an open-source automation server, to automate all our  
27 Wikidata bots. This system allows for flexible scheduling, job tracking, dependency management, and  
28 automated logging and notification. Bots are either run on a predefined schedule (for continuously  
29 updated resources) or when new versions of original databases are released.

## 30 Applications

### 31 Identifier Translation

32 Translating between identifiers from different databases is one of the most common operations in  
33 bioinformatics analyses. Unfortunately, these translations are most often done by bespoke scripts and  
34 based on entity-specific mapping tables. These translation scripts are repetitively and redundantly  
35 written across our community and are rarely kept up to date, nor integrated in a reusable fashion.

36  
37 An identifier translation service is a simple and straightforward application of the biomedical content in  
38 Wikidata. Based on mapping tables that have been imported, Wikidata items can be mapped to  
39 databases that are both widely- and rarely-used in the life sciences community. Because all these

1 mappings are stored in a centralized database and use a systematic data model, generic and reusable  
2 translation scripts can easily be written (**Figure 2**). These scripts can be used as a foundation for more  
3 complex Wikidata queries, or the results can be downloaded and used as part of larger scripts or  
4 analyses.

5  
6 There are a number of other tools that are also aimed at solving the identifier translation use case,  
7 including the BioThings APIs [39], BridgeDb [40], BioMart [41], UMLS [42], and NCI Thesaurus [43].  
8 Relative to these tools, Wikidata distinguishes itself with a unique combination of the following:

- 9  
10
- an almost limitless scope including all entities in biology, chemistry, and medicine;
  - a data model that can represent exact, broader, and narrow matches between items in different identifier namespaces (beyond semantically imprecise "cross-references");
  - programmatic access through web services with a track record of high performance and high availability
- 11  
12  
13  
14

15  
16 Moreover, Wikidata is also unique as it is the only tool that allows real-time community editing. So while  
17 Wikidata is certainly not complete with respect to identifier mappings, it can be continually improved  
18 independent of any centralized effort or curation authority. As a database of assertions and not of  
19 absolute truth, Wikidata is able to represent conflicting information (with provenance) when, for  
20 example, different curation authorities produce different mappings between entities. (However, as with  
21 any bioinformatics integration exercise, harmonization of cross-references between resources can  
22 include relationships other than 'exact match'. These instances can lead to Wikidata statements that  
23 are not explicitly declared, but rather the result of transitive inference.)  
24

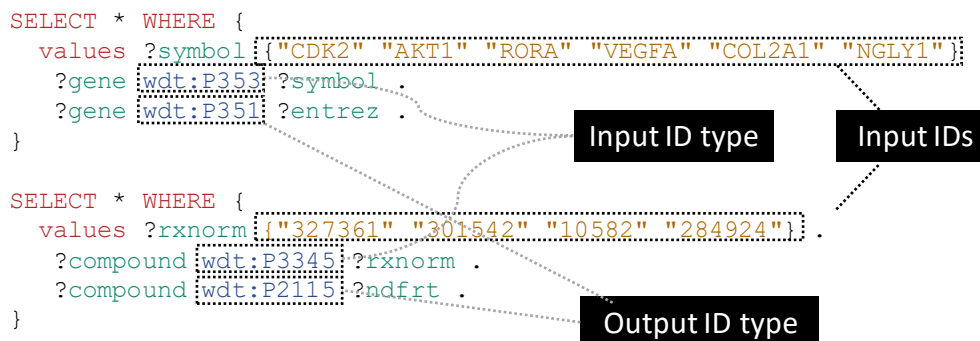

25  
26 **Figure 2. Generalizable SPARQL template for identifier translation.** SPARQL is the primary query language for accessing  
27 Wikidata content. These simple SPARQL examples show how identifiers of any biological type can easily be translated using  
28 SPARQL queries. The top query demonstrates the translation of a small list of gene symbols ("wdt:P353") to Entrez Gene IDs  
29 ("wdt:P351"), while the bottom example shows conversion of RxNorm concept IDs ("wdt:P3345") to NDF-RT IDs  
30 ("wdt:P2115"). These queries can be submitted to the Wikidata Query Service (WDQS; <https://query.wikidata.org/>) to get real-  
31 time results from Wikidata data. Translation to and from a wide variety of identifier types can be performed using slight  
32 modifications on these templates, and relatively simple extensions of these queries can filter mappings based on the  
33 statement references and/or qualifiers. A full list of Wikidata properties can be found at [44]. Note that for translating a large  
34 number of identifiers, it is often more efficient to perform a SPARQL query to retrieve all mappings and then perform additional  
35 filtering locally.  
36



## 1 Integrative Queries

2

3 Wikidata contains a much broader set of information than just identifier cross-references. Having  
4 biomedical data in one centralized data resource facilitates powerful integrative queries that span  
5 multiple domain areas and data sources. Performing these integrative queries through Wikidata  
6 obviates the need to perform many time-consuming and error-prone data integration steps.

7

8 As an example, consider a pulmonologist who is interested in identifying candidate chemical  
9 compounds for testing in disease models (schematically illustrated in **Figure 3**). She may start by  
10 identifying genes with a genetic association to any respiratory disease, with a particular interest in  
11 genes that encode membrane-bound proteins (for ease in cell sorting). She may then look for chemical  
12 compounds that either directly inhibit those proteins, or finding none, compounds that inhibit another  
13 protein in the same pathway. Because she has collaborators with relevant expertise, she may  
14 specifically filter for proteins containing a serine-threonine kinase domain.

15

16 Almost any competent informatician can perform the query described above by integrating cell  
17 localization data from Gene Ontology annotations, genetic associations from GWAS Catalog, disease  
18 subclass relationships from the Human Disease Ontology, pathway data from WikiPathways and  
19 Reactome, compound targets from the IUPHAR Guide to Pharmacology, and protein domain  
20 information from InterPro. However, actually performing this data integration is a time-consuming and  
21 error-prone process. At the time of publication of this manuscript, this Wikidata query completed in less  
22 than 10 seconds and reported 31 unique compounds. Importantly, the results of that query will always  
23 be up-to-date with the latest information in Wikidata.

24

25 This query, and other example SPARQL queries that take advantage of the rich, heterogeneous  
26 knowledge network in Wikidata are available at

27 [https://www.wikidata.org/wiki/User:ProteinBoxBot/SPARQL\\_Examples](https://www.wikidata.org/wiki/User:ProteinBoxBot/SPARQL_Examples). That page additionally  
28 demonstrates federated SPARQL queries that perform complex queries across other biomedical  
29 SPARQL endpoints. Federated queries are useful for accessing data that cannot be included in  
30 Wikidata directly due to limitations in size, scope, or licensing.

31

```

SELECT DISTINCT ?compound ?compoundLabel where {
(i) # gene has genetic association with a respiratory disease
?gene wdt:P31 wd:Q7187 .
?gene wdt:P2293 ?diseaseGA .
?diseaseGA wdt:P279* wd:Q3286546 .

(ii) # gene product is localized to the membrane
?gene wdt:P688 ?protein .
?protein wdt:P681 ?cc .
?cc wdt:P279*|wdt:P361* wd:Q14349455 .

(iii) # gene is involved in a pathway with another gene ("gene2")
?pathway wdt:P31 wd:Q4915012 ;
wdt:P527 ?gene ;
wdt:P527 ?gene2 .
?gene2 wdt:P31 wd:Q7187 .

(iv) # gene2 product has a Ser/Thr protein kinase domain AND
# known enzyme inhibitor
?gene2 wdt:P688 ?protein2 .
?protein2 wdt:P129 ?compound ;
wdt:P527 wd:Q24787419 ;
p:P129 ?s2 .
ps:P129 ?cp2 .
?compound wdt:P31 wd:Q111173 .
FILTER EXISTS { ?s2 pq:P366 wd:Q427492 . }

SERVICE wikibase:label { bd:serviceParam wikibase:language "en". }
    
```

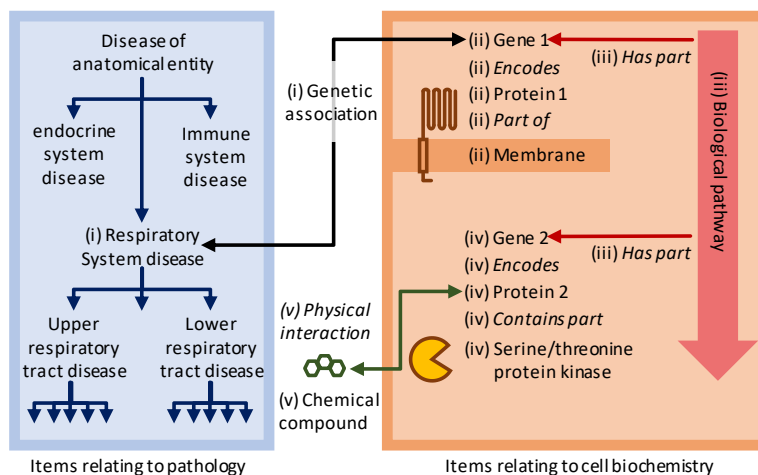

32

1  
2  
3  
4  
5  
6  
7  
8  
9

**Figure 3. A representative SPARQL query that integrates data from multiple data resources and annotation types.**

This example integrative query incorporates data on genetic associations to disease, Gene Ontology annotations for cellular compartment, protein target information for compounds, pathway data, and protein domain information. Specifically, this query (depicted schematically at right) retrieves genes that are (i) associated with a respiratory system disease, (ii) that encode a membrane-bound protein, and (iii) that sit within the same biochemical pathway as (iv) a second gene encoding a protein with a serine-threonine kinase domain and (v) a known inhibitor, and reports a list of those inhibitors. Aspects related to disease ontology in blue, aspects related to biochemistry in red/orange, aspects related to chemistry in green. Properties are shown in italics. Real-time query results can be viewed at <https://w.wiki/6pZ>.

10 **Crowdsourced Curation**

11 Ontologies are essential resources for structuring biomedical knowledge. However, even after the initial  
12 effort in creating an ontology is finalized, significant resources must be devoted to maintenance and  
13 further development. These tasks include cataloging cross references to other ontologies and  
14 vocabularies, and modifying the ontology as current knowledge evolves. Community curation has been  
15 explored in a variety of tasks in ontology curation and annotation (e.g., [13,45–48]). While community  
16 curation offers the potential of distributing these responsibilities over a wider set of scientists, it also has  
17 the potential to introduce errors and inconsistencies.

18  
19 Here, we examined how a crowd-based curation model through Wikidata works in practice. Specifically,  
20 we designed a hybrid system that combines the aggregated community effort of many individuals with  
21 the reliability of expert curation. First, we created a system to monitor, filter, and prioritize changes  
22 made by Wikidata contributors to items in the Human Disease Ontology. We initially seeded Wikidata  
23 with disease items from the Disease Ontology (DO) starting in late 2015. Beginning in 2018, we  
24 compared the disease data in Wikidata to the most current DO release on a monthly basis.

25  
26 In our first comparison between Wikidata and the official DO release, we found that Wikidata users  
27 added a total of 2030 new cross references to GARD [49] and MeSH [50]. These cross references were  
28 primarily added by a small handful of users through a web interface focused on identifier mapping [51].  
29 Each cross reference was manually reviewed by DO expert curators, and 2007 of these mappings  
30 (98.9%) were deemed correct and therefore added to the ensuing DO release. 771 of the proposed  
31 mappings could not be easily validated using simple string matching, and 754 (97.8%) of these were  
32 ultimately accepted into DO. Each subsequent monthly report included a smaller number of added  
33 cross references to GARD and MeSH, as well as ORDO [52], and OMIM [53,54], and these entries  
34 were incorporated after expert review at a high approval rate (>90%).

35  
36 Addition of identifier mappings represents the most common community contribution, and likely the  
37 most accessible crowdsourcing task. However, Wikidata users also suggested numerous refinements  
38 to the ontology structure, including changes to the subclass relationships and the addition of new  
39 disease terms. These structural changes were more nuanced and therefore rarely incorporated into DO  
40 releases with no modifications. Nevertheless, they often prompted further review and refinement by DO  
41 curators in specific subsections of the ontology.

42  
43 The Wikidata crowdsourcing curation model is generalizable to any other external resource that is  
44 automatically synced to Wikidata. The code to detect changes and assemble reports is tracked online

1 [55] and can easily be adapted to other domain areas. This approach offers a novel solution for  
2 integrating new knowledge into a biomedical ontology through distributed crowdsourcing while  
3 preserving control over the expert curation process. Incorporation into Wikidata also enhances  
4 exposure and visibility of the resource by engaging a broader community of users, curators, tools, and  
5 services.

## 6 Interactive Pathway Pages

7 In addition to its use as a repository for data, we explored the use of Wikidata as a primary access and  
8 visualization endpoint for pathway data. We used Scholia, a web app for displaying scholarly profiles for  
9 a variety of Wikidata entries, including individual researchers, research topics, chemicals, and proteins  
10 [56]. Scholia provides a more user-friendly view of Wikidata content with context and interactivity that is  
11 tailored to the entity type.

12  
13 We contributed a Scholia profile template specifically for biological pathways [57,58]. In addition to  
14 essential items such as title and description, these pathway pages include an interactive view of the  
15 pathway diagram collectively drawn by contributing authors. The WikiPathways identifier property in  
16 Wikidata informs the Scholia template to source a *pathway-viewer* widget from Toolforge [59] that in  
17 turn retrieves the corresponding interactive pathway image. Embedded into the Scholia pathway page,  
18 the widget provides pan and zoom, plus links to gene, protein and chemical Scholia pages for every  
19 clickable molecule on the pathway diagram (see for example [60]). Each pathway page also includes  
20 information about the pathway authors. The Scholia template also generates a participants table that  
21 shows the genes, proteins, metabolites, and chemical compounds that play a role in the pathway, as  
22 well as citation information in both tabular and chart formats.

23  
24 With Scholia template views of Wikidata, we were able to generate interactive pathway pages with  
25 comparable content and functionality to that of dedicated pathway databases. Wikidata provides a  
26 powerful interface to access these biological pathway data in the context of other biomedical  
27 knowledge, and Scholia templates provide rich, dynamic views of Wikidata that are relatively simple to  
28 develop and maintain.

## 29 Phenotype-based disease diagnosis

30 Phenomizer is a web application that suggests clinical diagnoses based on an array of patient  
31 phenotypes [61]. On the back end, the latest version of Phenomizer uses BOQA, an algorithm that uses  
32 ontological structure in a Bayesian network [62]. For phenotype-based disease diagnosis, BOQA takes  
33 as input a list of phenotypes (using the Human Phenotype Ontology (HPO) [63]) and an association file  
34 between phenotypes and diseases. BOQA then suggests disease diagnoses based on semantic  
35 similarity [61]. Here, we studied whether phenotype-disease associations from Wikidata could improve  
36 BOQA's ability to make differential diagnoses for certain sets of phenotypes. We modified the BOQA  
37 codebase to accept arbitrary inputs and to be able to run from the command line [64] and also wrote a  
38 script to extract and incorporate the phenotype-disease annotations in Wikidata [65].

39  
40 As of September 2019, there were 273 phenotype-disease associations in Wikidata that were not in the  
41 HPO's annotation file (which contained a total of 172,760 associations). Based on parallel biocuration

1 work by our team, many of these new associations were related to the disease Congenital Disorder of  
2 Deglycosylation (CDDG; also known as NGLY-1 deficiency) based on two papers describing patient  
3 phenotypes [66,67]. To see if the Wikidata-sourced annotations improved the ability of BOQA to  
4 diagnose CDDG, we ran our modified version using the phenotypes taken from a third publication  
5 describing two siblings with suspected cases of CDDG [68]. Using these phenotypes and the  
6 annotation file supplemented with Wikidata-derived associations, BOQA returned a much stronger  
7 semantic similarity to CDDG relative to the HPO annotation file alone (**Figure 4**). Analyses with the  
8 combined annotation file reported CDDG as the top result for each of the past 14 releases of the HPO  
9 annotation file, whereas CDDG was never the top result when run without the Wikidata-derived  
10 annotations.

11  
12 This result demonstrated an example scenario in which Wikidata-derived annotations could be a useful  
13 complement to expert curation. This example was specifically chosen to illustrate a favorable case, and  
14 the benefit of Wikidata would likely not currently generalize to a random sampling of other diseases.  
15 Nevertheless, we believe that this proof-of-concept demonstrates the value of the crowd-based  
16 Wikidata model and may motivate further community contributions.

17

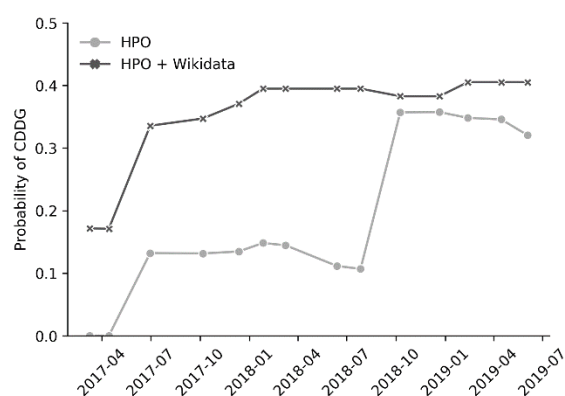

18

19 **Figure 4. BOQA analysis of suspected cases of CDDG.** We used BOQA to rank potential diagnoses based on clinical  
20 phenotypes. Here, clinical phenotypes from two cases of suspected CDDG patients were extracted from a published case  
21 report [68]. These phenotypes were run through BOQA using phenotype-disease annotations from HPO alone, or from a  
22 combination of HPO and Wikidata. This analysis was tested using several versions of disease-phenotype annotations (shown  
23 along the x-axis). The probability score for CDDG is reported on the y-axis. These results demonstrate that the inclusion of  
24 Wikidata-based disease-phenotype annotations would have significantly improved the diagnosis predictions from BOQA at  
25 earlier time points prior to their official inclusion in the HPO annotation file. Details of this analysis can be found at  
26 <https://github.com/SuLab/Wikidata-phenomizer> (archived at [69]).

## 27 Drug Repurposing

28 The mining of graphs for latent edges has been an area of interest in a variety of contexts from  
29 predicting friend relationships in social media platforms to suggesting movies based on past viewing  
30 history. A number of groups have explored the mining of knowledge graphs to reveal biomedical  
31 insights, with the open source Rephetio effort for drug repurposing as one example [70]. Rephetio uses  
32 logistic regression, with features based on graph metapaths, to predict drug repurposing candidates.

33

34 The knowledge graph that served as the foundation for Rephetio was manually assembled from many  
35 different resources into a heterogeneous knowledge network. Here, we explored whether the Rephetio

1 algorithm could successfully predict drug indications on the Wikidata knowledge graph. Based on the  
2 class diagram in **Figure 1**, we extracted a biomedically-focused subgraph of Wikidata with 19 node  
3 types and 41 edge types. We performed five-fold cross validation on drug indications within Wikidata  
4 and found that Rephetio substantially enriched the true indications in the hold-out set. We then  
5 downloaded historical Wikidata versions from 2017 and 2018, and observed marked improvements in  
6 performance over time (**Figure 6**). We also performed this analysis using an external test set based on  
7 Drug Central, which showed a similar improvement in Rephetio results over time (**Supplemental**  
8 **Figure 2**).

10 This analysis demonstrates the value of a community-maintained, centralized knowledge base to which  
11 many researchers are contributing. It suggests that scientific analyses based on Wikidata may  
12 continually improve irrespective of any changes to the underlying algorithms, but simply based on  
13 progress in curating knowledge through the distributed, and largely uncoordinated efforts of the  
14 Wikidata community.

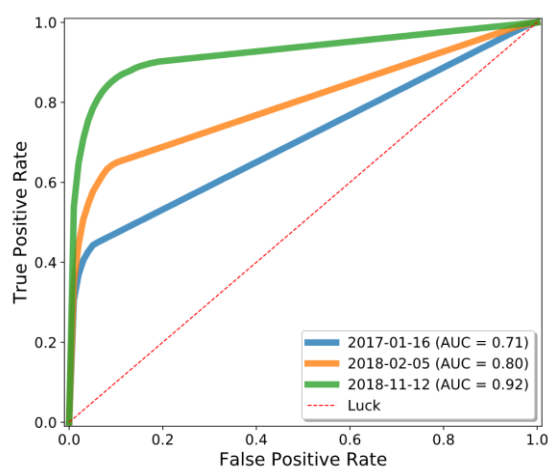

16  
17  
18 **Figure 5. Drug repurposing using the Wikidata knowledge graph.** We analyzed three snapshots of Wikidata using  
19 Rephetio, a graph-based algorithm for predicting drug repurposing candidates [70]. We evaluated the performance of the  
20 Rephetio algorithm on three historical versions of the Wikidata knowledge graph, quantified based on the area under the  
21 receiver operator characteristic curve (AUC). This analysis demonstrated that the performance of Rephetio in drug  
22 repurposing improved over time based only on improvements to the underlying knowledge graph. Details of this analysis can  
23 be found at <https://github.com/SuLab/WD-rephetio-analysis> (archived at [71]).

## 24 Discussion

25 We believe that the design of Wikidata is very well-aligned with the FAIR data principles.

- 26  
27 • **Findable:** Wikidata items are assigned globally unique identifiers with direct cross-links into the  
28 massive online ecosystem of Wikipedias. Wikidata also has broad visibility within the Linked  
29 Data community and is listed in the life science registries FAIRsharing [73] and Identifiers.org  
30 [74]. Wikidata has already attracted a robust, global community of contributors and consumers.

- 1 • **Accessible:** Wikidata provides access to its underlying knowledge graph via both an online  
2 graphical user interface and an API, and access includes both read- and write-privileges.  
3 Wikidata provides database dumps at least weekly [75], ensuring the long-term accessibility of  
4 the Wikidata knowledge graph independent of the organization and web application. Finally,  
5 Wikidata is also natively multilingual.
- 6 • **Interoperable:** Wikidata items are extensively cross-linked to other biomedical resources using  
7 Universal Resource Identifiers (URIs), which unambiguously anchor these concepts in the  
8 Linked Open Data cloud [76]. Wikidata is also available in many standard formats in computer  
9 programming and knowledge management, including JSON, XML, and RDF.
- 10 • **Reusable:** Data provenance is directly tracked in the reference section of the Wikidata  
11 statement model. The Wikidata knowledge graph is released under the Creative Commons Zero  
12 (CC0) Public Domain Declaration, which explicitly declares that there are no restrictions on  
13 downstream reuse and redistribution [77].  
14

15 The open data licensing of Wikidata is particularly notable. The use of data licenses in biomedical  
16 research has rapidly proliferated, presumably in an effort to protect intellectual property and/or justify  
17 long-term grant funding (e.g. [78]). However, even seemingly innocuous license terms (like  
18 requirements for attribution) still impose legal requirements and therefore expose consumers to legal  
19 liability. This liability is especially problematic for data integration efforts, in which the license terms of  
20 all resources (dozens or hundreds or more) must be independently tracked and satisfied (a  
21 phenomenon referred to as "license stacking"). Because it is released under CC0, Wikidata can be  
22 freely and openly used in any other resource without any restriction. This freedom greatly simplifies and  
23 encourages downstream use, albeit at the cost of not being able to incorporate ontologies or datasets  
24 with more restrictive licensing.  
25

26 In addition to simplifying data licensing, Wikidata offers significant advantages in centralizing the data  
27 harmonization process. Consider the use case of trying to get a comprehensive list of disease  
28 indications for the drug bupropion. The National Drug File - Reference Terminology (NDF-RT) reported  
29 that bupropion may treat nicotine dependence and attention deficit hyperactivity disorder, the Inxight  
30 database listed major depressive disorder, and the FDA Adverse Event Reporting System (FAERS)  
31 listed anxiety and bipolar disorder. While no single database listed all these indications, Wikidata  
32 provided an integrated view that enabled seamless query and access across resources. Integrating  
33 drug indication data from these individual data resources was not a trivial process. Both Inxight and  
34 NDF-RT mint their own identifiers for both drugs and diseases. FAERS uses Medical Dictionary for  
35 Regulatory Activities (MedDRA) names for diseases and free-text names for drugs [79]. By harmonizing  
36 and integrating all resources in the context of Wikidata, we ensure that those data are immediately  
37 usable by others without having to repeat the normalization process. Moreover, by harmonizing data at  
38 the time of data loading, consumers of that data do not need to perform the repetitive and redundant  
39 work at the point of querying and analysis.  
40

41 As the biomedical data within Wikidata continues to grow, we believe that its unencumbered use will  
42 spur the development of many new innovative tools and analyses. These innovations will undoubtedly  
43 include the machine learning-based mining of the knowledge graph to predict new relationships (also  
44 referred to as knowledge graph reasoning [80–82]).

1  
2 For those who subscribe to this vision for cultivating a FAIR and open graph of biomedical knowledge,  
3 there are two simple ways to contribute to Wikidata. First, owners of data resources can release their  
4 data using the CC0 declaration. Because Wikidata is released under CC0, it also means that all data  
5 imported in Wikidata must also use CC0-compatible terms (e.g., be in the public domain). For  
6 resources that currently use a restrictive data license primarily for the purposes of enforcing attribution  
7 or citation, we encourage the transition to "CC0 (+BY)", a model that "move[s] the attribution from the  
8 legal realm into the social or ethical realm by pairing a permissive license with a strong moral entreaty"  
9 [83]. For resources that must retain data license restrictions, consider releasing a subset of data or  
10 older versions of data using CC0. Many biomedical resources were created under or transitioned to  
11 CC0 (in part or in full) in recent years [84], including the Disease Ontology [35], Pfam [85], Bgee [86],  
12 WikiPathways [33], Reactome [32], ECO [87], and CIViC [20].  
13  
14 Second, informaticians can contribute to Wikidata by adding the results of data parsing and integration  
15 efforts to Wikidata as, for example, new Wikidata items, statements, or references. Currently, the useful  
16 lifespan of data integration code typically does not extend beyond the immediate project-specific use.  
17 As a result, that same data integration process is likely being done repetitively and redundantly by other  
18 informaticians elsewhere. If every informatician contributed the output of their effort to Wikidata, the  
19 resulting knowledge graph would be far more useful than the stand-alone contribution of any single  
20 individual, and it would continually improve in both breadth and depth over time. Indeed, the growth of  
21 biomedical data in Wikidata is driven not by any centralized or coordinated process, but rather the  
22 aggregated effort and priorities of Wikidata contributors themselves.  
23  
24 FAIR and open access to the sum total of biomedical knowledge will improve the efficiency of  
25 biomedical research. Capturing that information in a centralized knowledge graph is useful for  
26 experimental researchers, informatics tool developers and biomedical data scientists. As a  
27 continuously-updated and collaboratively-maintained community resource, we believe that Wikidata has  
28 made significant strides toward achieving this ambitious goal.  
29

## 30 Acknowledgments

31 The authors thank the thousands of Wikidata contributors for curating knowledge, both directly related  
32 and unrelated to this work, much of which has been organized under the WikiProjects for Molecular  
33 Biology, Chemistry, Medicine. The authors also thank the Wikimedia Foundation for financially  
34 supporting Wikidata, and many developers and administrators for maintaining Wikidata as a community  
35 resource. This work has been supported by grants from the National Institute for General Medical  
36 Science (NIGMS) under awards R01 GM089820 to AS, U54 GM114833 to AS and HH, and R01  
37 GM100039 to AP. MG is supported by the National Human Genome Research Institute (NHGRI) of the  
38 NIH under Award Number R00HG007940, the National Cancer Institute under Award Number  
39 U24CA237719 and the V Foundation for Cancer Research under Award Number V2018-007. KH was  
40 supported by the National Institute of Allergy and Infectious Diseases (NIAID) under award R01  
41 AI126785 Additional support was provided by the National Center for Advancing Translational Sciences  
42 (NCATS) under award UL1 TR002550.

1

## 2 Competing interests

3 The authors have no competing interests.



## 1 References

- 2 1. Wilkinson MD, Dumontier M, Aalbersberg IJJ, Appleton G, Axton M, Baak A, Blomberg N,  
3 Boiten J-W, da Silva Santos LB, Bourne PE, Bouwman J, Brookes AJ, Clark T, Crosas M, Dillo I,  
4 Dumon O, Edmunds S, Evelo CT, Finkers R, Gonzalez-Beltran A, Gray AJG, Groth P, Goble C,  
5 Grethe JS, Heringa J, 't Hoen PAC, Hooft R, Kuhn T, Kok R, Kok J, Lusher SJ, Martone ME,  
6 Mons A, Packer AL, Persson B, Rocca-Serra P, Roos M, van Schaik R, Sansone S-A, Schultes E,  
7 Sengstag T, Slater T, Strawn G, Swertz MA, Thompson M, van der Lei J, van Mulligen E,  
8 Velterop J, Waagmeester A, Wittenburg P, Wolstencroft K, Zhao J, Mons B. The FAIR Guiding  
9 Principles for scientific data management and stewardship. *Sci Data*. 2016 Mar 15;3:160018.  
10 PMCID: PMC4792175
- 11 2. Evaluating FAIR Maturity Through a Scalable, Automated, Community-Governed Framework |  
12 bioRxiv [Internet]. [cited 2019 Jul 31]. Available from:  
13 <https://www.biorxiv.org/content/10.1101/649202v1>
- 14 3. Mungall CJ, McMurry JA, Köhler S, Balhoff JP, Borromeo C, Brush M, Carbon S, Conlin T, Dunn  
15 N, Engelstad M, Foster E, Gouridine JP, Jacobsen JOB, Keith D, Laraway B, Lewis SE,  
16 NguyenXuan J, Shefchek K, Vasilevsky N, Yuan Z, Washington N, Hochheiser H, Groza T,  
17 Smedley D, Robinson PN, Haendel MA. The Monarch Initiative: an integrative data and analytic  
18 platform connecting phenotypes to genotypes across species. *Nucleic Acids Res*. 2017  
19 04;45(D1):D712–D722. PMCID: PMC5210586
- 20 4. Gabella C, Durinx C, Appel R. Funding knowledgebases: Towards a sustainable funding model for  
21 the UniProt use case. *F1000Research* [Internet]. 2018 Mar 22 [cited 2019 Aug 26];6. Available  
22 from: <https://www.ncbi.nlm.nih.gov/pmc/articles/PMC5747334/> PMCID: PMC5747334
- 23 5. Chandras C, Weaver T, Zouberakis M, Smedley D, Schughart K, Rosenthal N, Hancock JM,  
24 Kollias G, Schofield PN, Aidinis V. Models for financial sustainability of biological databases and  
25 resources. *Database* [Internet]. 2009 Jan 1 [cited 2019 Aug 26];2009. Available from:  
26 <https://academic.oup.com/database/article/doi/10.1093/database/bap017/357253>
- 27 6. Vrandečić D. Wikidata: A New Platform for Collaborative Data Collection. *Proc 21st Int Conf*  
28 *World Wide Web* [Internet]. New York, NY, USA: ACM; 2012 [cited 2019 Aug 1]. p. 1063–1064.  
29 Available from: <http://doi.acm.org/10.1145/2187980.2188242>
- 30 7. Wikidata Statistics [Internet]. [cited 2019 Sep 11]. Available from:  
31 <https://tools.wmflabs.org/wikidata-todo/stats.php>
- 32 8. Mora-Cantalops M, Sánchez-Alonso S, García-Barriocanal E. A systematic literature review on  
33 Wikidata. *Data Technol Appl* [Internet]. 2019 Jul 1 [cited 2019 Sep 6]; Available from:  
34 <https://www.emerald.com/insight/content/doi/10.1108/DTA-12-2018-0110/full/html>
- 35 9. Wikidata Query Service [Internet]. [cited 2019 Jul 31]. Available from: <https://query.wikidata.org/>

- 1 10. Burgstaller-Muehlbacher S, Waagmeester A, Mitraka E, Turner J, Putman T, Leong J, Naik C,  
2 Pavlidis P, Schriml L, Good BM, Su AI. Wikidata as a semantic framework for the Gene Wiki  
3 initiative. *Database J Biol Databases Curation*. 2016;2016. PMID: PMC4795929
- 4 11. Willighagen E, Slenter D, Mietchen D, Evelo C, Nielsen F. Wikidata and Scholia as a hub linking  
5 chemical knowledge [Internet]. 2018 [cited 2019 Aug 23]. Available from:  
6 [https://figshare.com/articles/Wikidata\\_and\\_Scholia\\_as\\_a\\_hub\\_linking\\_chemical\\_knowledge/6356](https://figshare.com/articles/Wikidata_and_Scholia_as_a_hub_linking_chemical_knowledge/6356027)  
7 027
- 8 12. Turki H, Shafee T, Taieb MAH, Aouicha MB, Vrandečić D, Das D, Hamdi H. Wikidata: A large-  
9 scale collaborative ontological medical database. *J Biomed Inform*. 2019 Sep 23;103292.
- 10 13. Putman TE, Lelong S, Burgstaller-Muehlbacher S, Waagmeester A, Diesh C, Dunn N, Munoz-  
11 Torres M, Stupp GS, Wu C, Su AI, Good BM. WikiGenomes: an open web application for  
12 community consumption and curation of gene annotation data in Wikidata. *Database J Biol*  
13 *Databases Curation*. 2017 01;2017(1). PMID: PMC5467579
- 14 14. Mike Mayers, Andrew Su, Gregory Stupp. SuLab/genewikiworld: Release v1.0 on 2020-01-15  
15 [Internet]. Zenodo; 2020 [cited 2020 Jan 15]. Available from:  
16 <https://zenodo.org/record/3609152#.Xh9MPMhKhaQ>
- 17 15. NCBI Resource Coordinators. Database resources of the National Center for Biotechnology  
18 Information. *Nucleic Acids Res*. 2018 04;46(D1):D8–D13. PMID: PMC5753372
- 19 16. Zerbino DR, Achuthan P, Akanni W, Amode MR, Barrell D, Bhai J, Billis K, Cummins C, Gall A,  
20 Girón CG, Gil L, Gordon L, Haggerty L, Haskell E, Hourlier T, Izuogu OG, Janacek SH,  
21 Juettemann T, To JK, Laird MR, Lavidas I, Liu Z, Loveland JE, Maurel T, McLaren W, Moore B,  
22 Mudge J, Murphy DN, Newman V, Nuhn M, Ogeh D, Ong CK, Parker A, Patricio M, Riat HS,  
23 Schuilenburg H, Sheppard D, Sparrow H, Taylor K, Thormann A, Vullo A, Walts B, Zadiisa A,  
24 Frankish A, Hunt SE, Kostadima M, Langridge N, Martin FJ, Muffato M, Perry E, Ruffier M,  
25 Staines DM, Trevanion SJ, Aken BL, Cunningham F, Yates A, Flicek P. Ensembl 2018. *Nucleic*  
26 *Acids Res*. 2018 04;46(D1):D754–D761. PMID: PMC5753206
- 27 17. UniProt: a worldwide hub of protein knowledge. *Nucleic Acids Res*. 2019 Jan 8;47(D1):D506–  
28 D515.
- 29 18. Mitchell AL, Attwood TK, Babbitt PC, Blum M, Bork P, Bridge A, Brown SD, Chang H-Y, El-  
30 Gebali S, Fraser MI, Gough J, Haft DR, Huang H, Letunic I, Lopez R, Luciani A, Madeira F,  
31 Marchler-Bauer A, Mi H, Natale DA, Necci M, Nuka G, Orengo C, Pandurangan AP, Paysan-  
32 Lafosse T, Pesseat S, Potter SC, Qureshi MA, Rawlings ND, Redaschi N, Richardson LJ, Rivoire  
33 C, Salazar GA, Sangrador-Vegas A, Sigrist CJA, Sillitoe I, Sutton GG, Thanki N, Thomas PD,  
34 Tosatto SCE, Yong S-Y, Finn RD. InterPro in 2019: improving coverage, classification and access  
35 to protein sequence annotations. *Nucleic Acids Res*. 2019 Jan 8;47(D1):D351–D360.
- 36 19. Burley SK, Berman HM, Bhikadiya C, Bi C, Chen L, Costanzo LD, Christie C, Duarte JM, Dutta  
37 S, Feng Z, Ghosh S, Goodsell DS, Green RK, Guranovic V, Guzenko D, Hudson BP, Liang Y,  
38 Lowe R, Peisach E, Periskova I, Randle C, Rose A, Sekharan M, Shao C, Tao Y-P, Valasatava Y,  
39 Voigt M, Westbrook J, Young J, Zardecki C, Zhuravleva M, Kurisu G, Nakamura H, Kengaku Y,

- 1 Cho H, Sato J, Kim JY, Ikegawa Y, Nakagawa A, Yamashita R, Kudou T, Bekker G-J, Suzuki H,  
2 Iwata T, Yokochi M, Kobayashi N, Fujiwara T, Velankar S, Kleywegt GJ, Anyango S, Armstrong  
3 DR, Berrisford JM, Conroy MJ, Dana JM, Deshpande M, Gane P, Gáborová R, Gupta D,  
4 Gutmanas A, Koča J, Mak L, Mir S, Mukhopadhyay A, Nadzirin N, Nair S, Patwardhan A,  
5 Paysan-Lafosse T, Pravda L, Salih O, Sehnal D, Varadi M, Vařeková R, Markley JL, Hoch JC,  
6 Romero PR, Baskaran K, Maziuk D, Ulrich EL, Wedell JR, Yao H, Livny M, Ioannidis YE.  
7 Protein Data Bank: the single global archive for 3D macromolecular structure data. *Nucleic Acids*  
8 *Res.* 2019 Jan 8;47(D1):D520–D528.
- 9 20. Griffith M, Spies NC, Krysiak K, McMichael JF, Coffman AC, Danos AM, Ainscough BJ,  
10 Ramirez CA, Rieke DT, Kujan L, Barnell EK, Wagner AH, Skidmore ZL, Wollam A, Liu CJ,  
11 Jones MR, Bilski RL, Lesurf R, Feng Y-Y, Shah NM, Bonakdar M, Trani L, Matlock M, Ramu A,  
12 Campbell KM, Spies GC, Graubert AP, Gangavarapu K, Eldred JM, Larson DE, Walker JR, Good  
13 BM, Wu C, Su AI, Dienstmann R, Margolin AA, Tamborero D, Lopez-Bigas N, Jones SJM, Bose  
14 R, Spencer DH, Wartman LD, Wilson RK, Mardis ER, Griffith OL. CIViC is a community  
15 knowledgebase for expert crowdsourcing the clinical interpretation of variants in cancer. *Nat*  
16 *Genet.* 2017 Jan 31;49(2):170–174. PMID: PMC5367263
- 17 21. Wang Y, Xiao J, Suzek TO, Zhang J, Wang J, Bryant SH. PubChem: a public information system  
18 for analyzing bioactivities of small molecules. *Nucleic Acids Res.* 2009 Jul 1;37(suppl\_2):W623–  
19 W633.
- 20 22. Nelson SJ, Zeng K, Kilbourne J, Powell T, Moore R. Normalized names for clinical drugs:  
21 RxNorm at 6 years. *J Am Med Inform Assoc.* 2011 Jul 1;18(4):441–448.
- 22 23. Harding SD, Sharman JL, Faccenda E, Southan C, Pawson AJ, Ireland S, Gray AJG, Bruce L,  
23 Alexander SPH, Anderton S, Bryant C, Davenport AP, Doerig C, Fabbro D, Levi-Schaffer F,  
24 Spedding M, Davies JA, NC-IUPHAR. The IUPHAR/BPS Guide to PHARMACOLOGY in 2018:  
25 updates and expansion to encompass the new guide to IMMUNOPHARMACOLOGY. *Nucleic*  
26 *Acids Res.* 2018 04;46(D1):D1091–D1106. PMID: PMC5753190
- 27 24. Southan C, Sharman JL, Benson HE, Faccenda E, Pawson AJ, Alexander SPH, Buneman OP,  
28 Davenport AP, McGrath JC, Peters JA, Spedding M, Catterall WA, Fabbro D, Davies JA, NC-  
29 IUPHAR. The IUPHAR/BPS Guide to PHARMACOLOGY in 2016: towards curated quantitative  
30 interactions between 1300 protein targets and 6000 ligands. *Nucleic Acids Res.* 2016 Jan  
31 4;44(D1):D1054-1068. PMID: PMC4702778
- 32 25. Pawson AJ, Sharman JL, Benson HE, Faccenda E, Alexander SPH, Buneman OP, Davenport AP,  
33 McGrath JC, Peters JA, Southan C, Spedding M, Yu W, Harmar AJ, NC-IUPHAR. The  
34 IUPHAR/BPS Guide to PHARMACOLOGY: an expert-driven knowledgebase of drug targets and  
35 their ligands. *Nucleic Acids Res.* 2014 Jan;42(Database issue):D1098-1106. PMID:  
36 PMC3965070
- 37 26. UMLS Metathesaurus - NDFRT (National Drug File - Reference Terminology) - Synopsis  
38 [Internet]. [cited 2019 Sep 9]. Available from:  
39 <https://www.nlm.nih.gov/research/umls/sourcereleasedocs/current/NDFRT/index.html>

- 1 27. Sud M, Fahy E, Cotter D, Brown A, Dennis EA, Glass CK, Merrill AH, Murphy RC, Raetz CRH,  
2 Russell DW, Subramaniam S. LMSD: LIPID MAPS structure database. *Nucleic Acids Res.* 2007  
3 Jan 1;35(suppl\_1):D527–D532.
- 4 28. Horai H, Arita M, Kanaya S, Nihei Y, Ikeda T, Suwa K, Ojima Y, Tanaka K, Tanaka S, Aoshima  
5 K, Oda Y, Kakazu Y, Kusano M, Tohge T, Matsuda F, Sawada Y, Hirai MY, Nakanishi H, Ikeda  
6 K, Akimoto N, Maoka T, Takahashi H, Ara T, Sakurai N, Suzuki H, Shibata D, Neumann S, Iida  
7 T, Tanaka K, Funatsu K, Matsuura F, Soga T, Taguchi R, Saito K, Nishioka T. MassBank: a public  
8 repository for sharing mass spectral data for life sciences. *J Mass Spectrom.* 2010;45(7):703–714.
- 9 29. Wohlgemuth G, Mehta SS, Mejia RF, Neumann S, Pedrosa D, Pluskal T, Schymanski EL,  
10 Willighagen EL, Wilson M, Wishart DS, Arita M, Dorrestein PC, Bandeira N, Wang M, Schulze  
11 T, Salek RM, Steinbeck C, Nainala VC, Mistrik R, Nishioka T, Fiehn O. SPLASH, a hashed  
12 identifier for mass spectra. *Nat Biotechnol.* 2016 Nov 8;34:1099–1101.
- 13 30. Shin J-M, Cho D-H. PDB-Ligand: a ligand database based on PDB for the automated and  
14 customized classification of ligand-binding structures. *Nucleic Acids Res.* 2005 Jan  
15 1;33(suppl\_1):D238–D241.
- 16 31. Williams AJ, Grulke CM, Edwards J, McEachran AD, Mansouri K, Baker NC, Patlewicz G, Shah  
17 I, Wambaugh JF, Judson RS, Richard AM. The CompTox Chemistry Dashboard: a community  
18 data resource for environmental chemistry. *J Cheminformatics.* 2017 Nov 28;9(1):61.
- 19 32. Fabregat A, Jupe S, Matthews L, Sidiropoulos K, Gillespie M, Garapati P, Haw R, Jassal B,  
20 Korninger F, May B, Milacic M, Roca CD, Rothfels K, Sevilla C, Shamovsky V, Shorser S,  
21 Varusai T, Viteri G, Weiser J, Wu G, Stein L, Hermjakob H, D’Eustachio P. The Reactome  
22 Pathway Knowledgebase. *Nucleic Acids Res.* 2018 Jan 4;46(D1):D649–D655. PMID:  
23 PMC5753187
- 24 33. Slenter DN, Kutmon M, Hanspers K, Riutta A, Windsor J, Nunes N, Mélius J, Cirillo E, Coort SL,  
25 Digles D, Ehrhart F, Giesbertz P, Kalafati M, Martens M, Miller R, Nishida K, Rieswijk L,  
26 Waagmeester A, Eijssen LMT, Evelo CT, Pico AR, Willighagen EL. WikiPathways: a  
27 multifaceted pathway database bridging metabolomics to other omics research. *Nucleic Acids Res.*  
28 2018 Jan 4;46(D1):D661–D667. PMID: PMC5753270
- 29 34. Sprague ER. ORCID. *J Med Libr Assoc JMLA.* 2017 Apr;105(2):207–208. PMID: PMC5370620
- 30 35. Schriml LM, Mitraga E, Munro J, Tauber B, Schor M, Nickle L, Felix V, Jeng L, Bearer C,  
31 Lichenstein R, Bisordi K, Campion N, Hyman B, Kurland D, Oates CP, Kibbey S, Sreekumar P,  
32 Le C, Giglio M, Greene C. Human Disease Ontology 2018 update: classification, content and  
33 workflow expansion. *Nucleic Acids Res.* 2019 Jan 8;47(D1):D955–D962.
- 34 36. Ayers P, Mietchen D, Orlowitz J, Proffitt M, Rodlund S, Seiver E, Taraborelli D, Vershbow B.  
35 WikiCite 2018-2019: Citations for the sum of all human knowledge [Internet]. 2019 [cited 2019  
36 Sep 6]. Available from: [https://figshare.com/articles/WikiCite\\_2018-  
37 2019\\_Citations\\_for\\_the\\_sum\\_of\\_all\\_human\\_knowledge/8947451](https://figshare.com/articles/WikiCite_2018-2019_Citations_for_the_sum_of_all_human_knowledge/8947451)

- 1 37. Wikidata:WikiProject Molecular biology - Wikidata [Internet]. [cited 2019 Jul 29]. Available from:  
2 [https://www.wikidata.org/wiki/Wikidata:WikiProject\\_Molecular\\_biology](https://www.wikidata.org/wiki/Wikidata:WikiProject_Molecular_biology)
- 3 38. A Wikidata Python module integrating the MediaWiki API and the Wikidata SPARQL endpoint:  
4 SuLab/WikidataIntegrator [Internet]. Su Lab; 2019 [cited 2019 Jul 23]. Available from:  
5 <https://github.com/SuLab/WikidataIntegrator>
- 6 39. Xin J, Afrasiabi C, Lelong S, Adesara J, Tsueng G, Su AI, Wu C. Cross-linking BioThings APIs  
7 through JSON-LD to facilitate knowledge exploration. *BMC Bioinformatics*. 2018 01;19(1):30.  
8 PMID: PMC5796402
- 9 40. van Iersel MP, Pico AR, Kelder T, Gao J, Ho I, Hanspers K, Conklin BR, Evelo CT. The BridgeDb  
10 framework: standardized access to gene, protein and metabolite identifier mapping services. *BMC*  
11 *Bioinformatics*. 2010 Jan 4;11(1):5.
- 12 41. Smedley D, Haider S, Durinck S, Pandini L, Provero P, Allen J, Arnaiz O, Awedh MH, Baldock R,  
13 Barbiera G, Bardou P, Beck T, Blake A, Bonierbale M, Brookes AJ, Bucci G, Buetti I, Burge S,  
14 Cabau C, Carlson JW, Chelala C, Chrysostomou C, Cittaro D, Collin O, Cordova R, Cutts RJ,  
15 Dassi E, Genova AD, Djari A, Esposito A, Estrella H, Eyraas E, Fernandez-Banet J, Forbes S, Free  
16 RC, Fujisawa T, Gadaleta E, Garcia-Manteiga JM, Goodstein D, Gray K, Guerra-Assunção JA,  
17 Haggarty B, Han D-J, Han BW, Harris T, Harshbarger J, Hastings RK, Hayes RD, Hoede C, Hu S,  
18 Hu Z-L, Hutchins L, Kan Z, Kawaji H, Keliet A, Kerhornou A, Kim S, Kinsella R, Klopp C, Kong  
19 L, Lawson D, Lazarevic D, Lee J-H, Letellier T, Li C-Y, Lio P, Liu C-J, Luo J, Maass A, Mariette  
20 J, Maurel T, Merella S, Mohamed AM, Moreews F, Nabihoudine I, Ndegwa N, Noirot C, Perez-  
21 Llamas C, Primig M, Quattrone A, Quesneville H, Rambaldi D, Reecy J, Riba M, Rosanoff S,  
22 Saddiq AA, Salas E, Sallou O, Shepherd R, Simon R, Sperling L, Spooner W, Staines DM,  
23 Steinbach D, Stone K, Stupka E, Teague JW, Dayem Ullah AZ, Wang J, Ware D, Wong-Erasmus  
24 M, Youens-Clark K, Zadissa A, Zhang S-J, Kasprzyk A. The BioMart community portal: an  
25 innovative alternative to large, centralized data repositories. *Nucleic Acids Res*. 2015 Jul  
26 1;43(W1):W589–W598.
- 27 42. Bodenreider O. The Unified Medical Language System (UMLS): integrating biomedical  
28 terminology. *Nucleic Acids Res*. 2004 Jan 1;32(Database issue):D267-270. PMID: PMC308795
- 29 43. de Coronado S, Wright LW, Fragoso G, Haber MW, Hahn-Dantona EA, Hartel FW, Quan SL,  
30 Safran T, Thomas N, Whiteman L. The NCI Thesaurus quality assurance life cycle. *J Biomed*  
31 *Inform*. 2009 Jun;42(3):530–539. PMID: 19475726
- 32 44. List of Properties - Wikidata [Internet]. [cited 2019 Aug 23]. Available from:  
33 <https://www.wikidata.org/wiki/Special:ListProperties>
- 34 45. Gil Y, Garijo D, Ratnakar V, Khider D, Emile-Geay J, McKay N. A Controlled Crowdsourcing  
35 Approach for Practical Ontology Extensions and Metadata Annotations. In: d'Amato C, Fernandez  
36 M, Tamma V, Lecue F, Cudré-Mauroux P, Sequeda J, Lange C, Heflin J, editors. *Semantic Web –*  
37 *ISWC 2017*. Springer International Publishing; 2017. p. 231–246.

- 1 46. Bunt SM, Grumbling GB, Field HI, Marygold SJ, Brown NH, Millburn GH, FlyBase Consortium.  
2 Directly e-mailing authors of newly published papers encourages community curation. Database J  
3 Biol Databases Curation. 2012;2012:bas024. PMCID: PMC3342516
- 4 47. Wang M, Carver JJ, Phelan VV, Sanchez LM, Garg N, Peng Y, Nguyen DD, Watrous J, Kapono  
5 CA, Luzzatto-Knaan T, Porto C, Bouslimani A, Melnik AV, Meehan MJ, Liu W-T, Crüsemann M,  
6 Boudreau PD, Esquenazi E, Sandoval-Calderón M, Kersten RD, Pace LA, Quinn RA, Duncan KR,  
7 Hsu C-C, Floros DJ, Gavilan RG, Kleigrew K, Northen T, Dutton RJ, Parrot D, Carlson EE, Aigle  
8 B, Michelsen CF, Jelsbak L, Sohlenkamp C, Pevzner P, Edlund A, McLean J, Piel J, Murphy BT,  
9 Gerwick L, Liaw C-C, Yang Y-L, Humpf H-U, Maansson M, Keyzers RA, Sims AC, Johnson AR,  
10 Sidebottom AM, Sedio BE, Klitgaard A, Larson CB, Boya P CA, Torres-Mendoza D, Gonzalez  
11 DJ, Silva DB, Marques LM, Demarque DP, Pociute E, O'Neill EC, Briand E, Helfrich EJM,  
12 Granatosky EA, Glukhov E, Ryffel F, Houson H, Mohimani H, Kharbush JJ, Zeng Y, Vorholt JA,  
13 Kurita KL, Charusanti P, McPhail KL, Nielsen KF, Vuong L, Elfeki M, Traxler MF, Engene N,  
14 Koyama N, Vining OB, Baric R, Silva RR, Mascuch SJ, Tomasi S, Jenkins S, Macherla V,  
15 Hoffman T, Agarwal V, Williams PG, Dai J, Neupane R, Gurr J, Rodríguez AMC, Lamsa A,  
16 Zhang C, Dorrestein K, Duggan BM, Almaliti J, Allard P-M, Phapale P, Nothias L-F, Alexandrov  
17 T, Litaudon M, Wolfender J-L, Kyle JE, Metz TO, Peryea T, Nguyen D-T, VanLeer D, Shinn P,  
18 Jadhav A, Müller R, Waters KM, Shi W, Liu X, Zhang L, Knight R, Jensen PR, Palsson BØ,  
19 Pogliano K, Linington RG, Gutiérrez M, Lopes NP, Gerwick WH, Moore BS, Dorrestein PC,  
20 Bandeira N. Sharing and community curation of mass spectrometry data with Global Natural  
21 Products Social Molecular Networking. *Nat Biotechnol.* 2016 Aug;34(8):828–837.
- 22 48. Putman T, Hybiske K, Jow D, Afrasiabi C, Lelong S, Cano MA, Stupp GS, Waagmeester A, Good  
23 BM, Wu C, Su AI. ChlamBase: a curated model organism database for the Chlamydia research  
24 community. Database J Biol Databases Curation. 2019 01;2019. PMCID: PMC6580685
- 25 49. Lewis J, Snyder M, Hyatt-Knorr H. Marking 15 years of the Genetic and Rare Diseases  
26 Information Center. *Transl Sci Rare Dis.* 2017 May 25;2(1–2):77–88. PMCID: PMC5685198
- 27 50. Medical Subject Headings - Home Page [Internet]. [cited 2019 Aug 27]. Available from:  
28 <https://www.nlm.nih.gov/mesh/meshhome.html>
- 29 51. Mix'n'match [Internet]. [cited 2020 Jan 8]. Available from: [https://tools.wmflabs.org/mix-n-](https://tools.wmflabs.org/mix-n-match/#/)  
30 [match/#/](https://tools.wmflabs.org/mix-n-match/#/)
- 31 52. Maiella S, Olry A, Hanauer M, Lanneau V, Lourghi H, Donadille B, Rodwell C, Köhler S, Seelow  
32 D, Jupp S, Parkinson H, Groza T, Brudno M, Robinson PN, Rath A. Harmonising phenomics  
33 information for a better interoperability in the rare disease field. *Eur J Med Genet.* 2018  
34 Nov;61(11):706–714. PMID: 29425702
- 35 53. Amberger JS, Hamosh A. Searching Online Mendelian Inheritance in Man (OMIM): A  
36 Knowledgebase of Human Genes and Genetic Phenotypes. *Curr Protoc Bioinforma.* 2017  
37 27;58:1.2.1-1.2.12. PMCID: PMC5662200
- 38 54. McKusick VA. Mendelian Inheritance in Man and its online version, OMIM. *Am J Hum Genet.*  
39 2007 Apr;80(4):588–604. PMCID: PMC1852721

- 1 55. GeneWiki Scheduled Bots. Contribute to SuLab/scheduled-bots development by creating an  
2 account on GitHub [Internet]. Su Lab; 2019 [cited 2019 Aug 23]. Available from:  
3 <https://github.com/SuLab/scheduled-bots>
- 4 56. Nielsen FÅ, Mietchen D, Willighagen E. Scholia, Scientometrics and Wikidata. In: Blomqvist E,  
5 Hose K, Paulheim H, Ławrynowicz A, Ciravegna F, Hartig O, editors. Semantic Web ESWC 2017  
6 Satell Events. Cham: Springer International Publishing; 2017. p. 237–259.
- 7 57. fnielsen/scholia [Internet]. GitHub. [cited 2019 Sep 27]. Available from:  
8 <https://github.com/fnielsen/scholia>
- 9 58. Scholia [Internet]. [cited 2019 Oct 1]. Available from: <https://tools.wmflabs.org/scholia/pathway/>
- 10 59. Tool information: pathway-viewer - Wikimedia Toolforge [Internet]. [cited 2019 Sep 27].  
11 Available from: <https://tools.wmflabs.org/admin/tool/pathway-viewer>
- 12 60. Scholia, ACE Inhibitor Pathway [Internet]. Available from:  
13 <https://tools.wmflabs.org/scholia/pathway/Q29892242>
- 14 61. Köhler S, Schulz MH, Krawitz P, Bauer S, Dölken S, Ott CE, Mundlos C, Horn D, Mundlos S,  
15 Robinson PN. Clinical diagnostics in human genetics with semantic similarity searches in  
16 ontologies. *Am J Hum Genet.* 2009 Oct;85(4):457–464. PMID: PMC2756558
- 17 62. Bauer S, Köhler S, Schulz MH, Robinson PN. Bayesian ontology querying for accurate and noise-  
18 tolerant semantic searches. *Bioinforma Oxf Engl.* 2012 Oct 1;28(19):2502–2508. PMID:  
19 PMC3463114
- 20 63. Köhler S, Vasilevsky NA, Engelstad M, Foster E, McMurry J, Aymé S, Baynam G, Bello SM,  
21 Boerkoel CF, Boycott KM, Brudno M, Buske OJ, Chinnery PF, Cipriani V, Connell LE, Dawkins  
22 HJS, DeMare LE, Devereau AD, de Vries BBA, Firth HV, Freson K, Greene D, Hamosh A, Helbig  
23 I, Hum C, Jähn JA, James R, Krause R, F. Laulederkind SJ, Lochmüller H, Lyon GJ, Ogishima S,  
24 Olry A, Ouwehand WH, Pontikos N, Rath A, Schaefer F, Scott RH, Segal M, Sergouniotis PI,  
25 Sever R, Smith CL, Straub V, Thompson R, Turner C, Turro E, Veltman MWM, Vulliamy T, Yu J,  
26 von Ziegenweid J, Zankl A, Züchner S, Zemojtel T, Jacobsen JOB, Groza T, Smedley D, Mungall  
27 CJ, Haendel M, Robinson PN. The Human Phenotype Ontology in 2017. *Nucleic Acids Res.* 2017  
28 Jan 4;45(D1):D865–D876.
- 29 64. Bayesian ontology querying from Bauer et al. Contribute to SuLab/boqa development by creating  
30 an account on GitHub [Internet]. Su Lab; 2018 [cited 2019 Jul 23]. Available from:  
31 <https://github.com/SuLab/boqa>
- 32 65. Incorporate wikidata statements into phenomizer. Contribute to SuLab/Wikidata-phenomizer  
33 development by creating an account on GitHub [Internet]. Su Lab; 2019 [cited 2019 Jul 23].  
34 Available from: <https://github.com/SuLab/Wikidata-phenomizer>
- 35 66. Enns GM, Shashi V, Bainbridge M, Gambello MJ, Zahir FR, Bast T, Crimian R, Schoch K, Platt J,  
36 Cox R, Bernstein JA, Scavina M, Walter RS, Bibb A, Jones M, Hegde M, Graham BH, Need AC,  
37 Oviedo A, Schaaf CP, Boyle S, Butte AJ, Chen R, Chen R, Clark MJ, Haraksingh R, FORGE

- 1 Canada Consortium, Cowan TM, He P, Langlois S, Zoghbi HY, Snyder M, Gibbs RA, Freeze HH,  
2 Goldstein DB. Mutations in NGLY1 cause an inherited disorder of the endoplasmic reticulum-  
3 associated degradation pathway. *Genet Med Off J Am Coll Med Genet*. 2014 Oct;16(10):751–758.  
4 PMID: PMC4243708
- 5 67. Lam C, Ferreira C, Krasnewich D, Toro C, Latham L, Zein WM, Lehky T, Brewer C, Baker EH,  
6 Thurm A, Farmer CA, Rosenzweig SD, Lyons JJ, Schreiber JM, Gropman A, Lingala S, Ghany  
7 MG, Solomon B, Macnamara E, Davids M, Stratakis CA, Kimonis V, Gahl WA, Wolfe L.  
8 Prospective phenotyping of NGLY1-CDDG, the first congenital disorder of deglycosylation. *Genet  
9 Med Off J Am Coll Med Genet*. 2017;19(2):160–168. PMID: 27388694
- 10 68. Caglayan AO, Comu S, Baranoski JF, Parman Y, Kaymakçalan H, Akgumus GT, Caglar C, Dolen  
11 D, Erson-Omay EZ, Harmanci AS, Mishra-Gorur K, Freeze HH, Yasuno K, Bilguvar K, Gunel M.  
12 NGLY1 mutation causes neuromotor impairment, intellectual disability, and neuropathy. *Eur J  
13 Med Genet*. 2015 Jan;58(1):39–43. PMID: PMC4804755
- 14 69. Roger Tu, Gregory Stupp, Andrew Su. SuLab/Wikidata-phenomizer: Release v1.0 on 2020-01-15  
15 [Internet]. Zenodo; 2020 [cited 2020 Jan 15]. Available from:  
16 <https://zenodo.org/record/3609142#.Xh9JrchKhaQ>
- 17 70. Himmelstein DS, Lizee A, Hessler C, Brueggeman L, Chen SL, Hadley D, Green A, Khankhanian  
18 P, Baranzini SE. Systematic integration of biomedical knowledge prioritizes drugs for repurposing.  
19 *eLife*. 2017 22;6. PMID: PMC5640425
- 20 71. Mike Mayers, Andrew Su. SuLab/WD-rephetio-analysis: Release v1.0 on 2020-01-15 [Internet].  
21 Zenodo; 2020 [cited 2020 Jan 15]. Available from:  
22 <https://zenodo.org/record/3609154#.Xh9LmMhKhaQ>
- 23 72. Union PO of the E. Turning FAIR into reality : final report and action plan from the European  
24 Commission expert group on FAIR data. [Internet]. 2018 [cited 2019 Aug 23]. Available from:  
25 [https://publications.europa.eu/en/publication-detail/-/publication/7769a148-f1f6-11e8-9982-  
26 01aa75ed71a1/language-en/format-PDF](https://publications.europa.eu/en/publication-detail/-/publication/7769a148-f1f6-11e8-9982-01aa75ed71a1/language-en/format-PDF)
- 27 73. Sansone S-A, McQuilton P, Rocca-Serra P, Gonzalez-Beltran A, Izzo M, Lister AL, Thurston M.  
28 FAIRsharing as a community approach to standards, repositories and policies. *Nat Biotechnol*.  
29 2019 Apr;37(4):358–367.
- 30 74. Wimalaratne SM, Juty N, Kunze J, Janée G, McMurry JA, Beard N, Jimenez R, Grethe JS,  
31 Hermjakob H, Martone ME, Clark T. Uniform resolution of compact identifiers for biomedical  
32 data. *Sci Data*. 2018 May 8;5:180029.
- 33 75. Wikidata:Database download - Wikidata [Internet]. [cited 2019 Aug 8]. Available from:  
34 [https://www.wikidata.org/wiki/Wikidata:Database\\_download](https://www.wikidata.org/wiki/Wikidata:Database_download)
- 35 76. Jacobsen A. Wikidata as an intuitive resource towards semantic data modeling in data  
36 FAIRification. 2018; Available from: <http://ceur-ws.org/Vol-2275/short1.pdf>



- 1 77. Creative Commons — CC0 1.0 Universal [Internet]. [cited 2019 Aug 8]. Available from:  
2 <https://creativecommons.org/publicdomain/zero/1.0/>
- 3 78. Reiser L, Berardini TZ, Li D, Muller R, Strait EM, Li Q, Mezheritsky Y, Vetushko A, Huala E.  
4 Sustainable funding for biocuration: The Arabidopsis Information Resource (TAIR) as a case study  
5 of a subscription-based funding model. Database J Biol Databases Curation. 2016;2016. PMID:  
6 PMC4795935
- 7 79. Stupp GS, Su AI. Drug Indications Extracted from FAERS [Internet]. Zenodo; 2018 [cited 2019  
8 Jun 27]. Available from: <https://zenodo.org/record/1436000#.XRVY5-hKguU>
- 9 80. Das R, Dhuliawala S, Zaheer M, Vilnis L, Durugkar I, Krishnamurthy A, Smola A, McCallum A.  
10 Go for a Walk and Arrive at the Answer: Reasoning Over Paths in Knowledge Bases using  
11 Reinforcement Learning. ArXiv171105851 Cs [Internet]. 2017 Nov 15 [cited 2019 May 6];  
12 Available from: <http://arxiv.org/abs/1711.05851>
- 13 81. Xiong W, Hoang T, Wang WY. DeepPath: A Reinforcement Learning Method for Knowledge  
14 Graph Reasoning. ArXiv170706690 Cs [Internet]. 2017 Jul 20 [cited 2019 May 6]; Available from:  
15 <http://arxiv.org/abs/1707.06690>
- 16 82. Lin XV, Socher R, Xiong C. Multi-Hop Knowledge Graph Reasoning with Reward Shaping.  
17 ArXiv180810568 Cs [Internet]. 2018 Aug 30 [cited 2019 May 6]; Available from:  
18 <http://arxiv.org/abs/1808.10568>
- 19 83. CC0 (+BY) – Dan Cohen [Internet]. [cited 2019 Aug 8]. Available from:  
20 <https://dancohen.org/2013/11/26/cc0-by/>
- 21 84. FAIRsharing [Internet]. [cited 2019 Jan 25]. Available from: <https://fairsharing.org/>
- 22 85. El-Gebali S, Mistry J, Bateman A, Eddy SR, Luciani A, Potter SC, Qureshi M, Richardson LJ,  
23 Salazar GA, Smart A, Sonnhammer ELL, Hirsh L, Paladin L, Piovesan D, Tosatto SCE, Finn RD.  
24 The Pfam protein families database in 2019. Nucleic Acids Res. 2019 Jan 8;47(D1):D427–D432.
- 25 86. Bastian F, Parmentier G, Roux J, Moretti S, Laudet V, Robinson-Rechavi M. Bgee: Integrating and  
26 Comparing Heterogeneous Transcriptome Data Among Species. In: Bairoch A, Cohen-Boulakia S,  
27 Froidevaux C, editors. Data Integr Life Sci. Springer Berlin Heidelberg; 2008. p. 124–131.
- 28 87. Chibucos MC, Mungall CJ, Balakrishnan R, Christie KR, Huntley RP, White O, Blake JA, Lewis  
29 SE, Giglio M. Standardized description of scientific evidence using the Evidence Ontology (ECO).  
30 Database [Internet]. 2014 Jan 1 [cited 2019 Aug 8];2014. Available from:  
31 <https://academic.oup.com/database/article/doi/10.1093/database/bau075/2634798>
- 32 88. Ursu O, Holmes J, Knockel J, Bologna CG, Yang JJ, Mathias SL, Nelson SJ, Oprea TI.  
33 DrugCentral: online drug compendium. Nucleic Acids Res. 2017 Jan 4;45(D1):D932–D939.

34  
35

## 1 Supplemental Figures

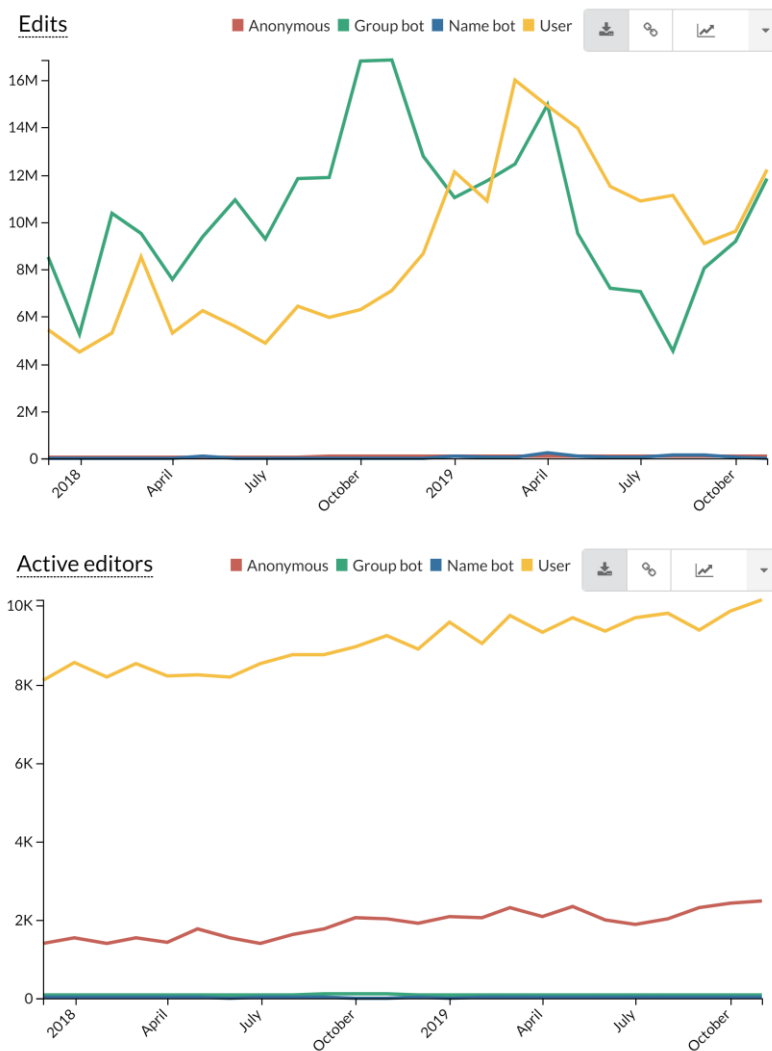

2  
3  
4  
5  
6  
7  
8  
9

**Supplemental Figure 1. Trends in Wikidata edits.** Wikidata edits are categorized into four categories: anonymous edits with no user account ("anonymous"), edits from formally registered bots ("group bot"), edits from user accounts that are presumed to be bots based on the user account name ("name bot"), and all other edits from registered, logged-in users. These graphs demonstrate that Wikidata receives substantial contributions from both automated bots and individual users. Statistics are shown for the periods between December 2017 through December 2019. More statistics are available at <https://stats.wikimedia.org/v2/#/wikidata.org>.

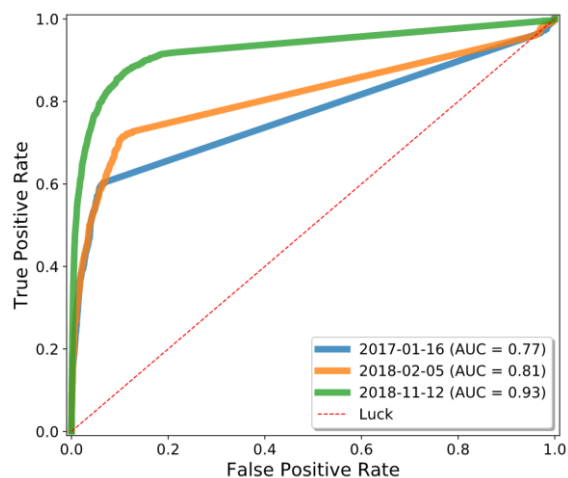

1  
2  
3  
4  
5

**Supplemental Figure 2. Drug repurposing using the Wikidata knowledge graph, evaluated using an external test set.** Whereas the analysis in Figure 5 was based on a cross-validation of indications that were present in Wikidata, we also ran our time-resolved analysis using an external gold standard set of indications from Drug Central [88].
